# Supplementary material for: Boron trifluoride etherate promoted microwave-assisted synthesis of antimalarial acridones
Source: Royal Society of Chemistry journal article supplement (doi:10.1039/c9ra09478d), 2019-01-01

# Supporting Information

## *<sup>1</sup>H and <sup>13</sup>C NMR Spectra of the final products*

Name KP-102  
PROTON DMSO {C:\Bruker\TopSpin3.5p17} Reynold-Papireddy-HYG 3

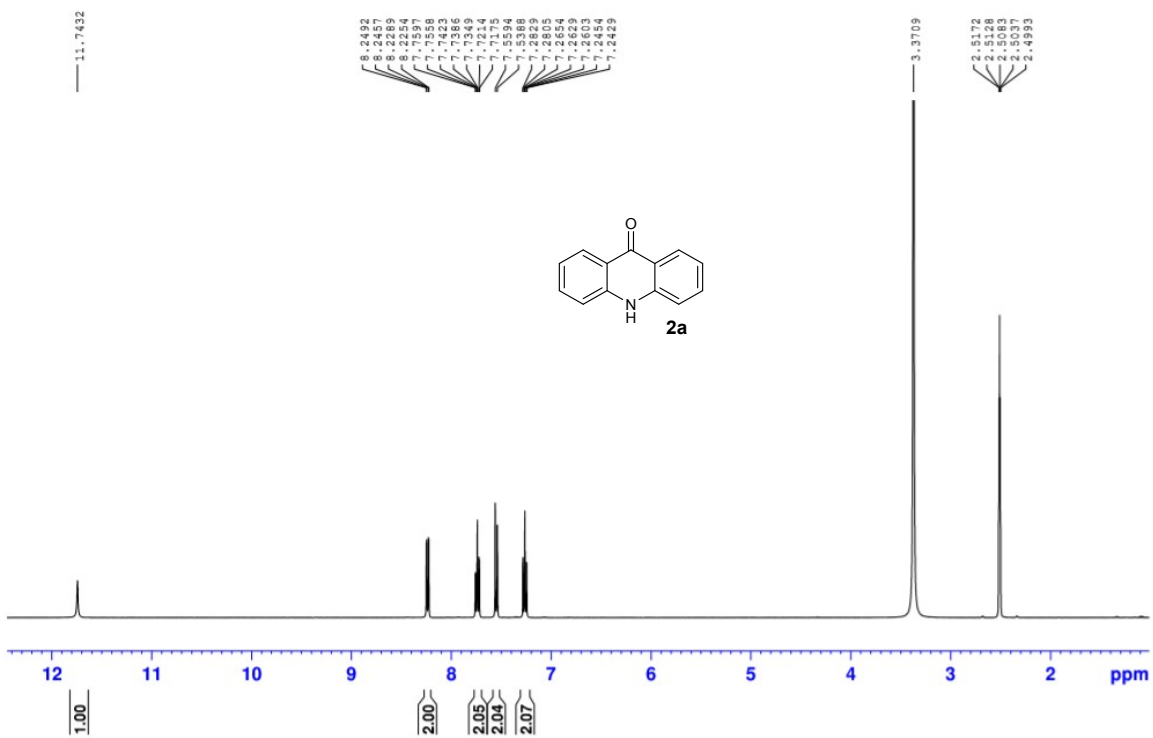

Name KP-102  
C13CPD DMSO {C:\Bruker\TopSpin3.5pl7} Reynold-Papireddy-HYG 2

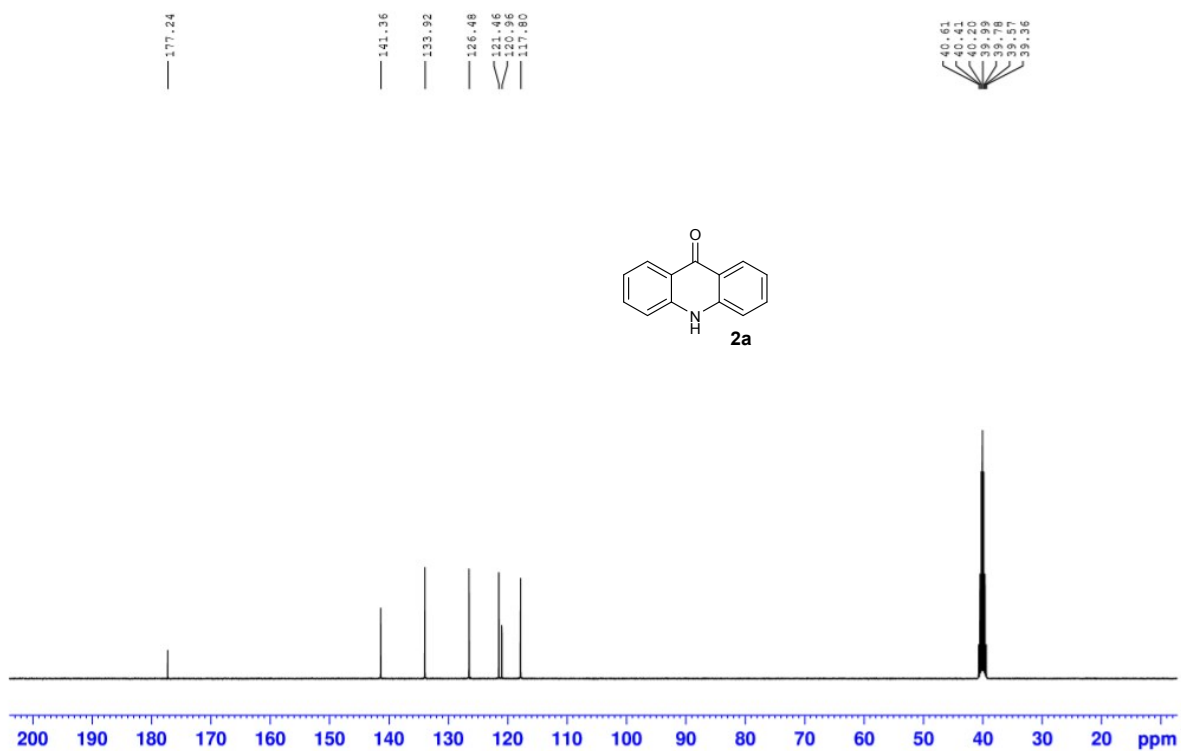

Name KP-134.2  
PROTON DMSO {C:\Bruker\TopSpin3.5pl7} Reynold-Papireddy-HYG 19

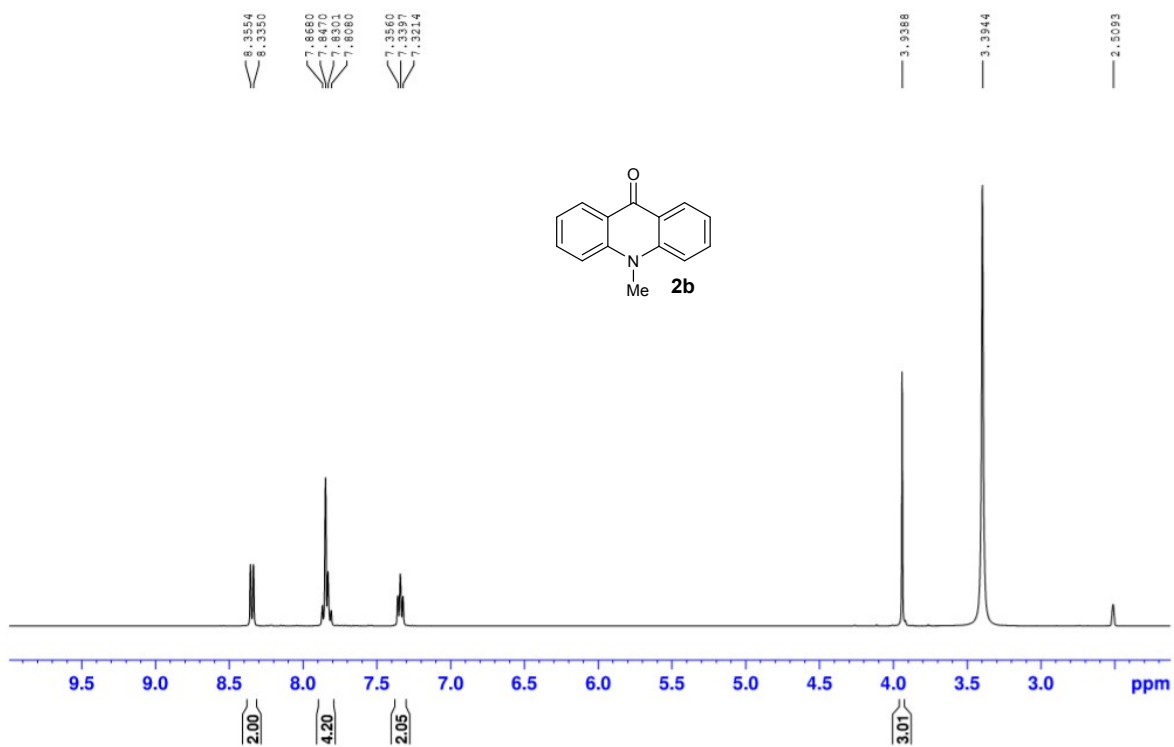

Name KP-134  
C13CPD DMSO {C:\Bruker\TopSpin3.5p17} Reynold-Papireddy-HYG 2

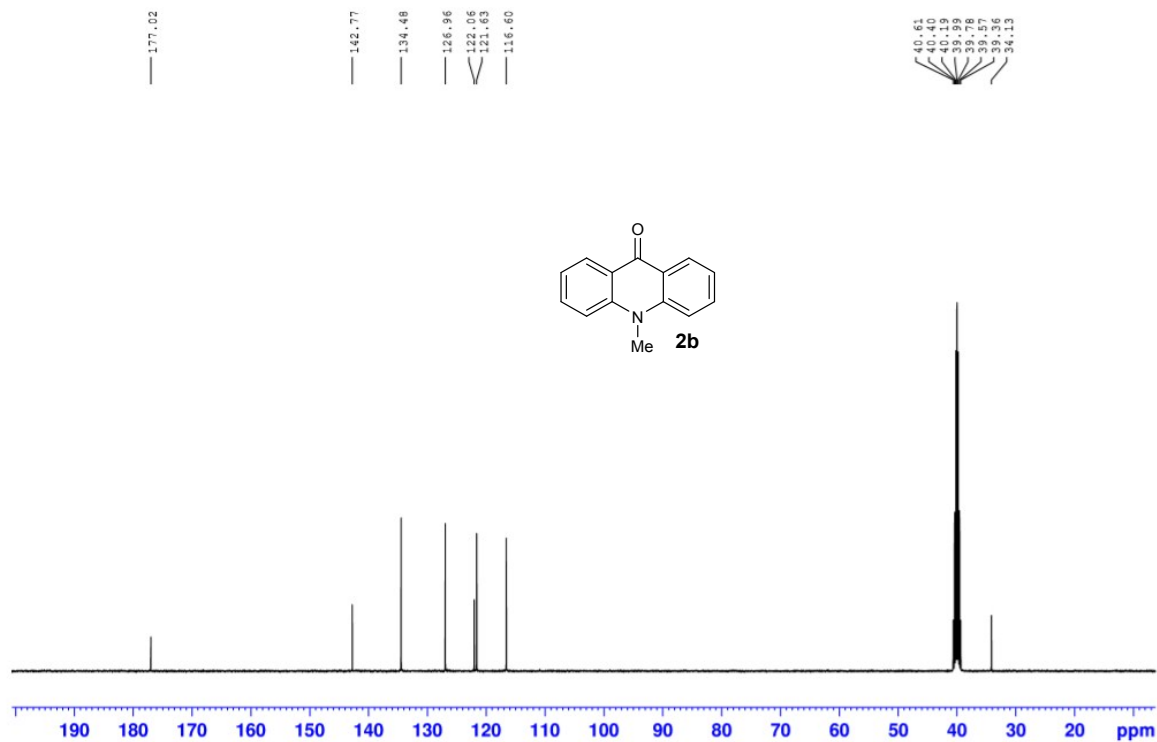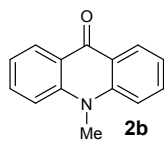

Name KP-165  
PROTON CDC13 {C:\Bruker\TopSpin3.5p17} Reynold-Papireddy-HYG 2

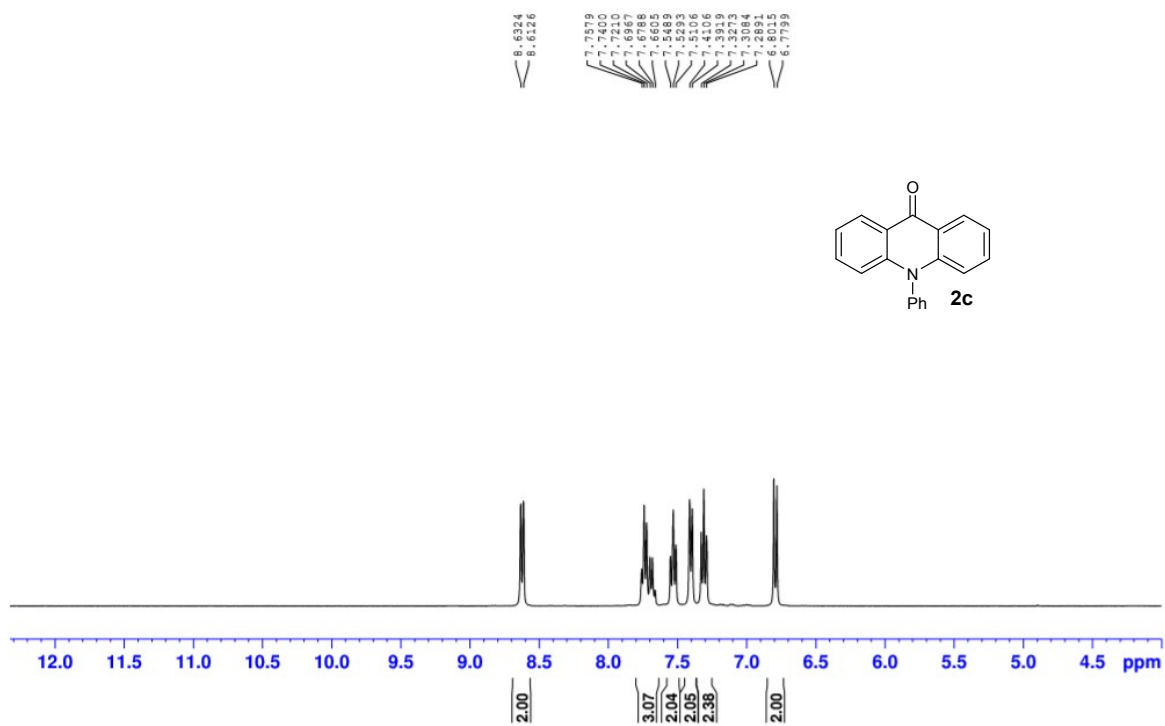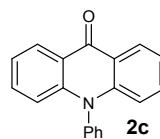

Name KP-165  
 C13CPD CDC13 {C:\Bruker\TopSpin3.5p17} Reynold-Papireddy-HYG 4

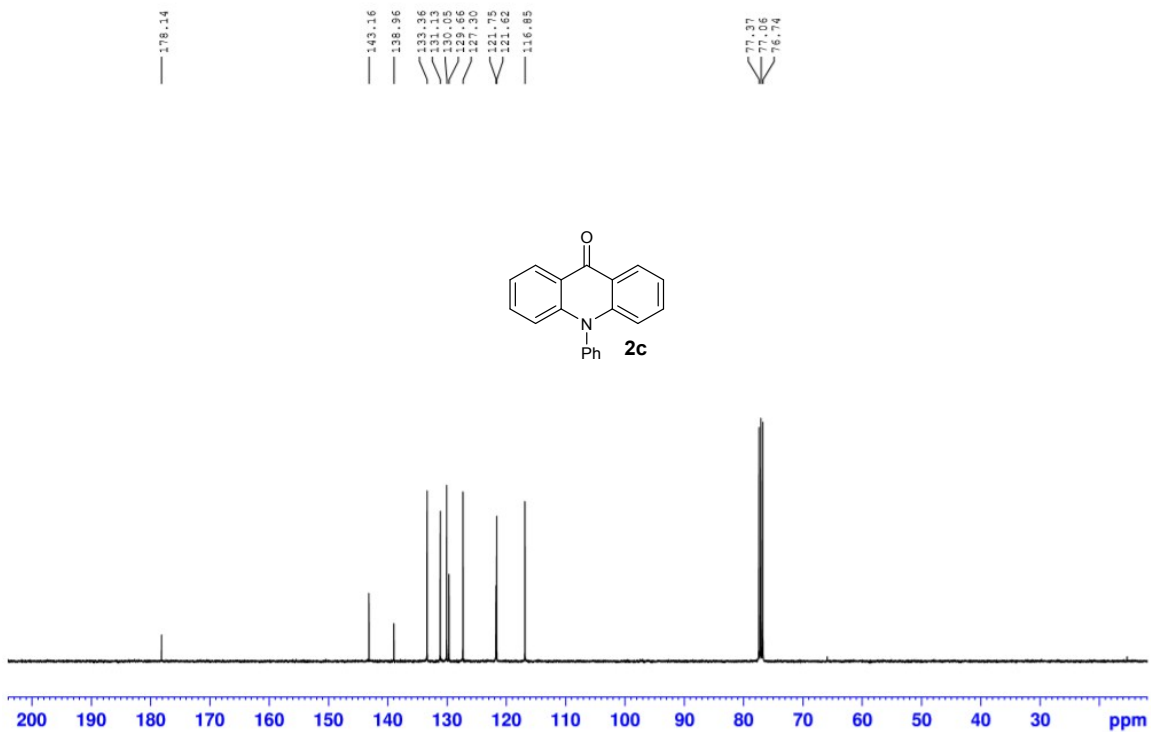

Name KP-159  
 PROTON DMSO {C:\Bruker\TopSpin3.5p17} Reynold-Papireddy-HYG 8

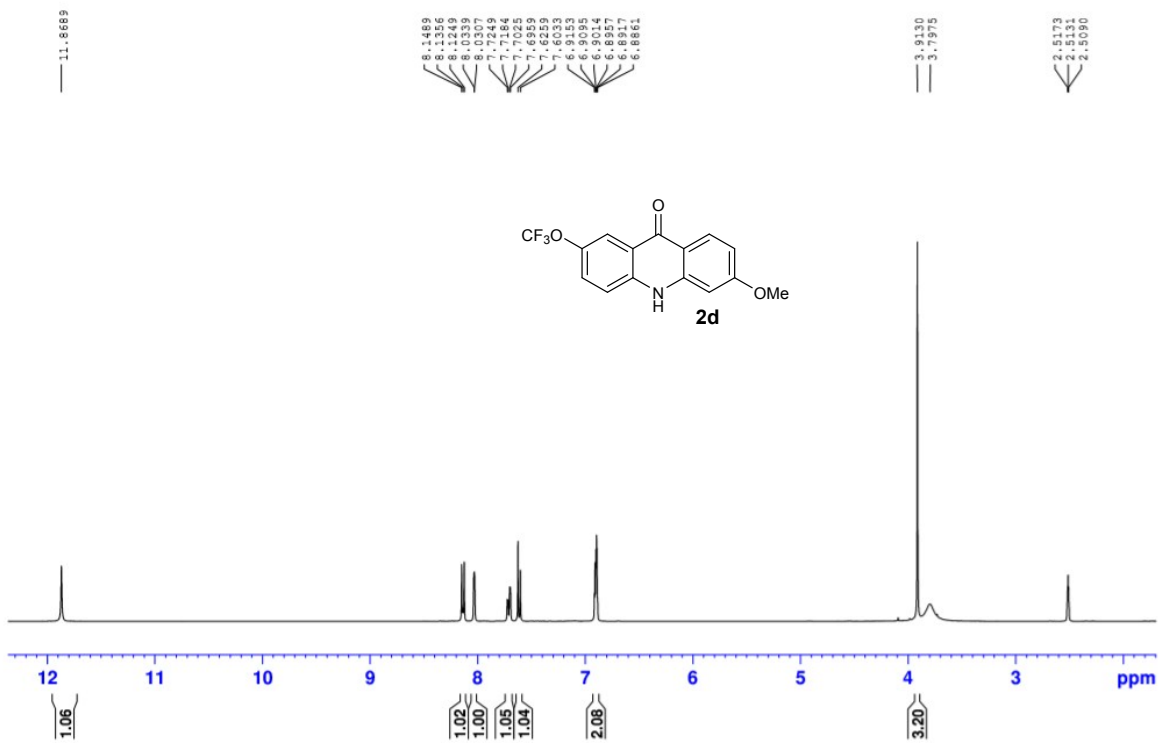

Name KP-159  
 C13CPD DMSO {C:\Bruker\TopSpin3.5p17} Reynold-Papireddy-HYG 18

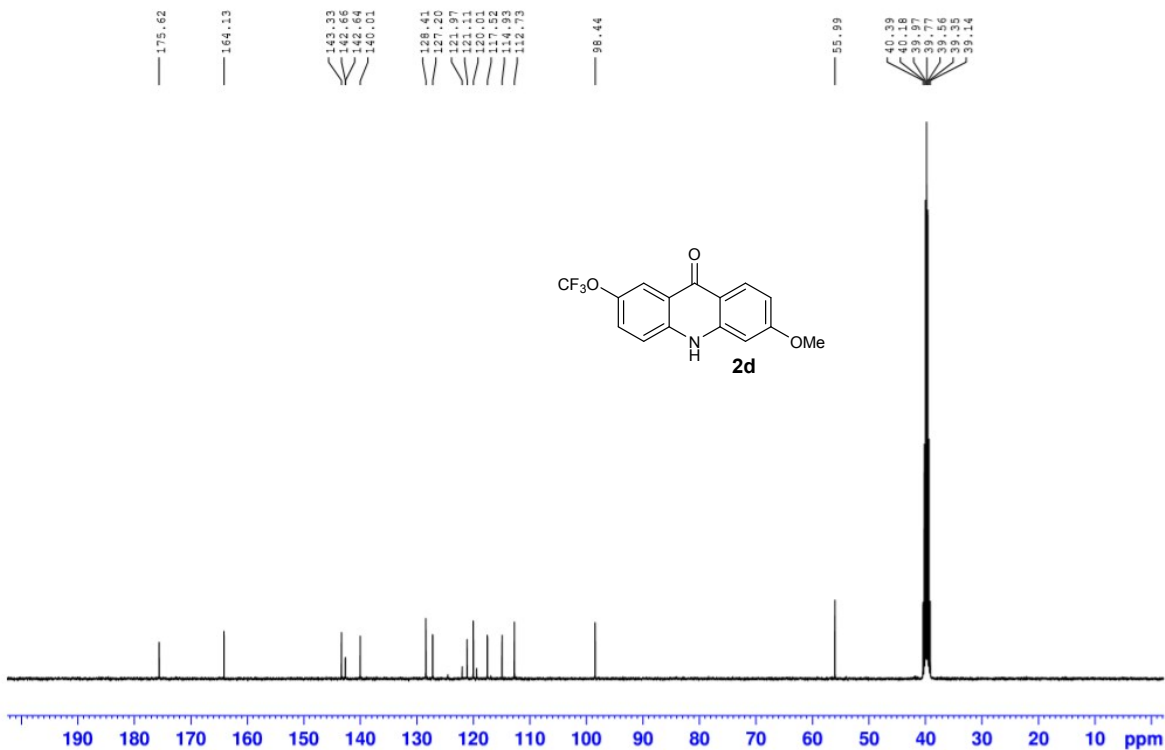

Name KP-141  
 PROTON DMSO {C:\Bruker\TopSpin3.5p17} Reynold-Papireddy-HYG 4

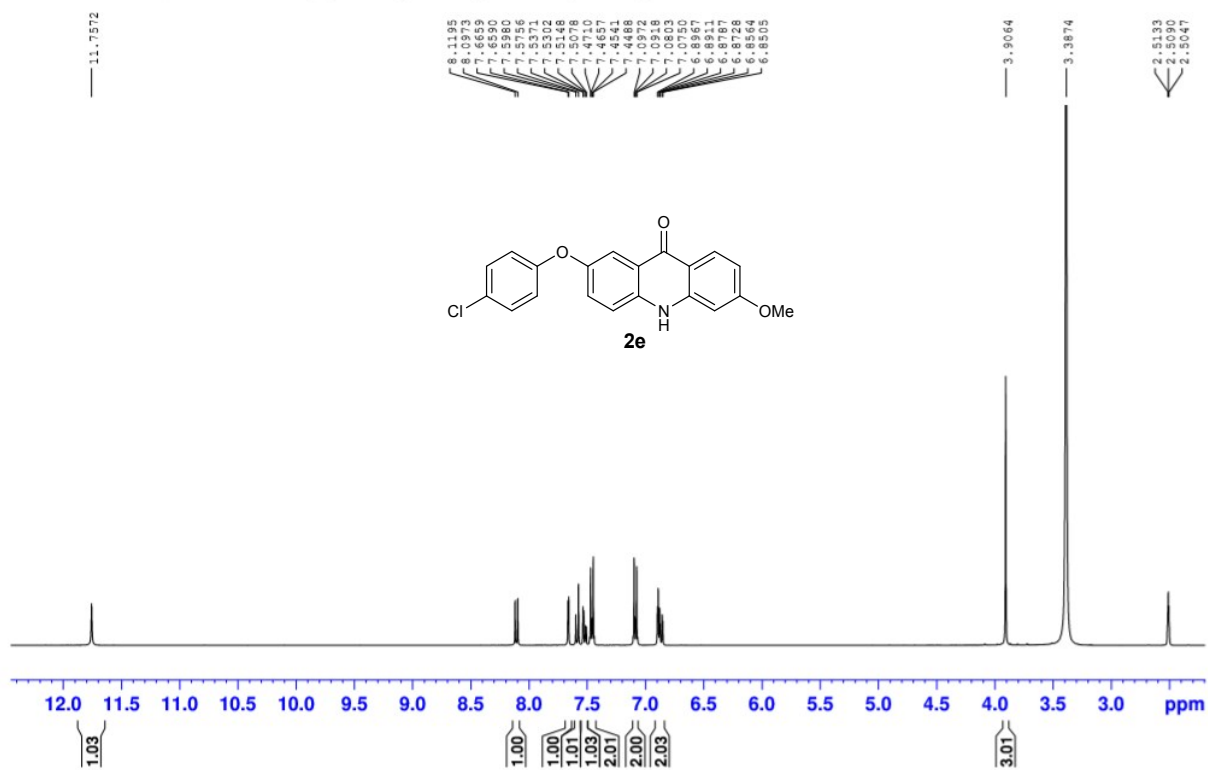

Name KP-141  
 C13CPD DMSO {C:\Bruker\TopSpin3.5pl7} Reynold-Papireddy-HYG 19

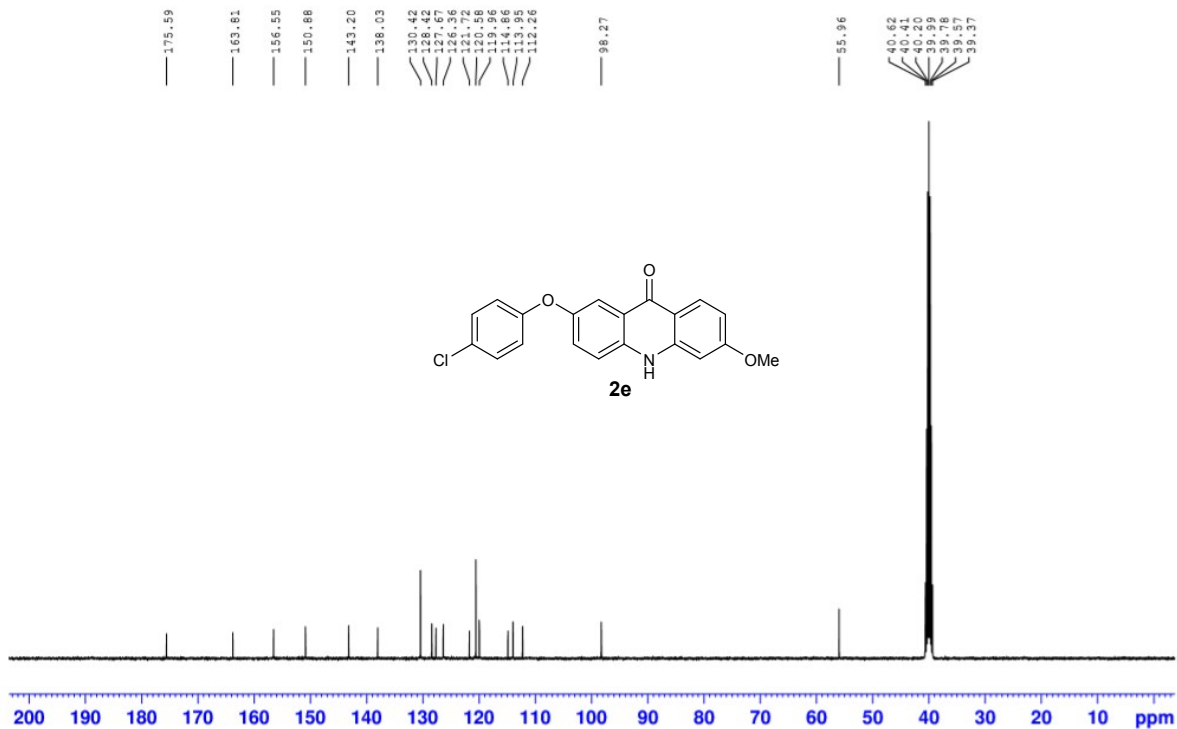

Name kp-164.2  
 PROTON DMSO {C:\Bruker\TopSpin3.5pl7} Reynold-Papireddy-HYG 6

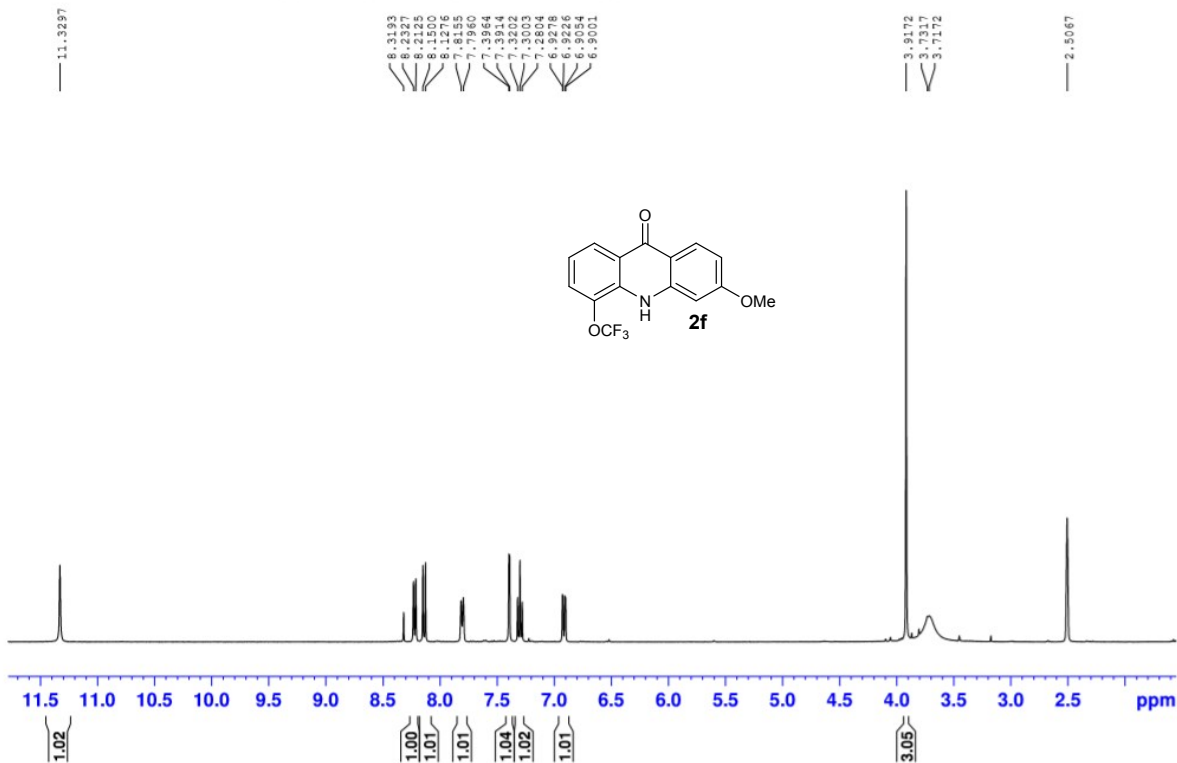

Name KP-164  
 C13CPD DMSO {C:\Bruker\TopSpin3.5p17} Reynold-Papireddy-HYG 1

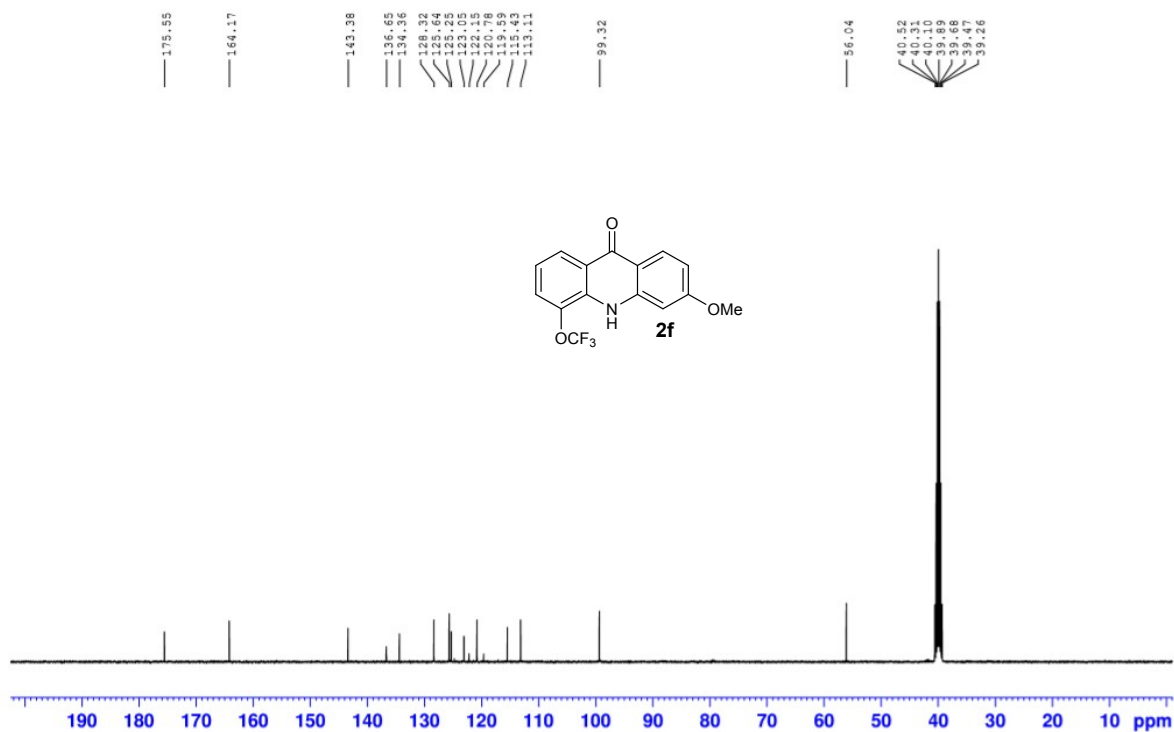

Name KP-143  
 PROTON DMSO {C:\Bruker\TopSpin3.5p17} Reynold-Papireddy-HYG 1

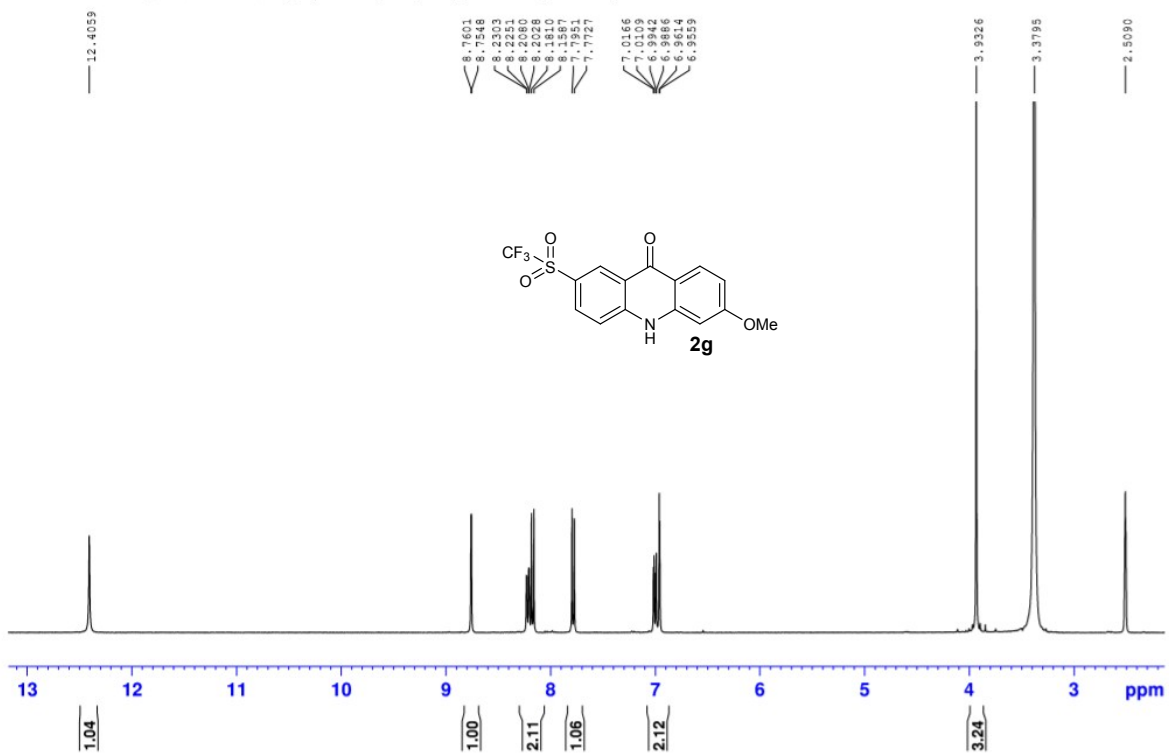

Name KP-143  
 C13CPD DMSO {C:\Bruker\TopSpin3.5pl7} Reynold-Papireddy-HYG 20

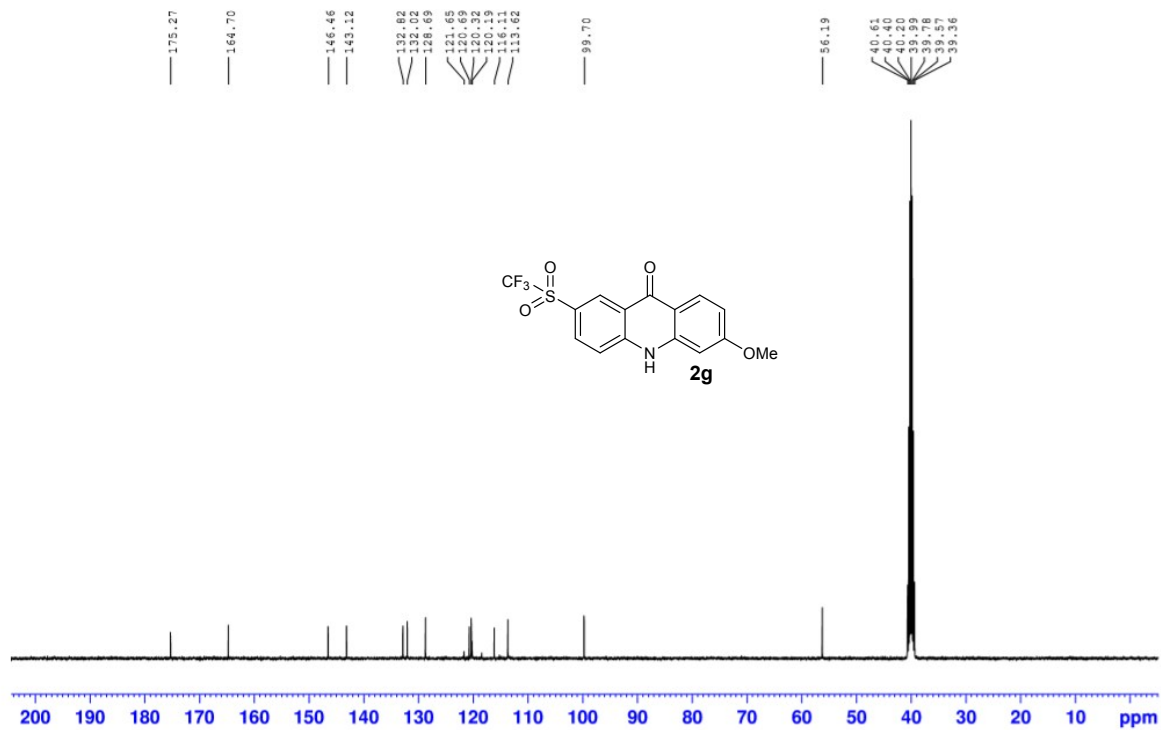

Name KP-160  
 PROTON DMSO {C:\Bruker\TopSpin3.5pl7} Reynold-Papireddy-HYG 9

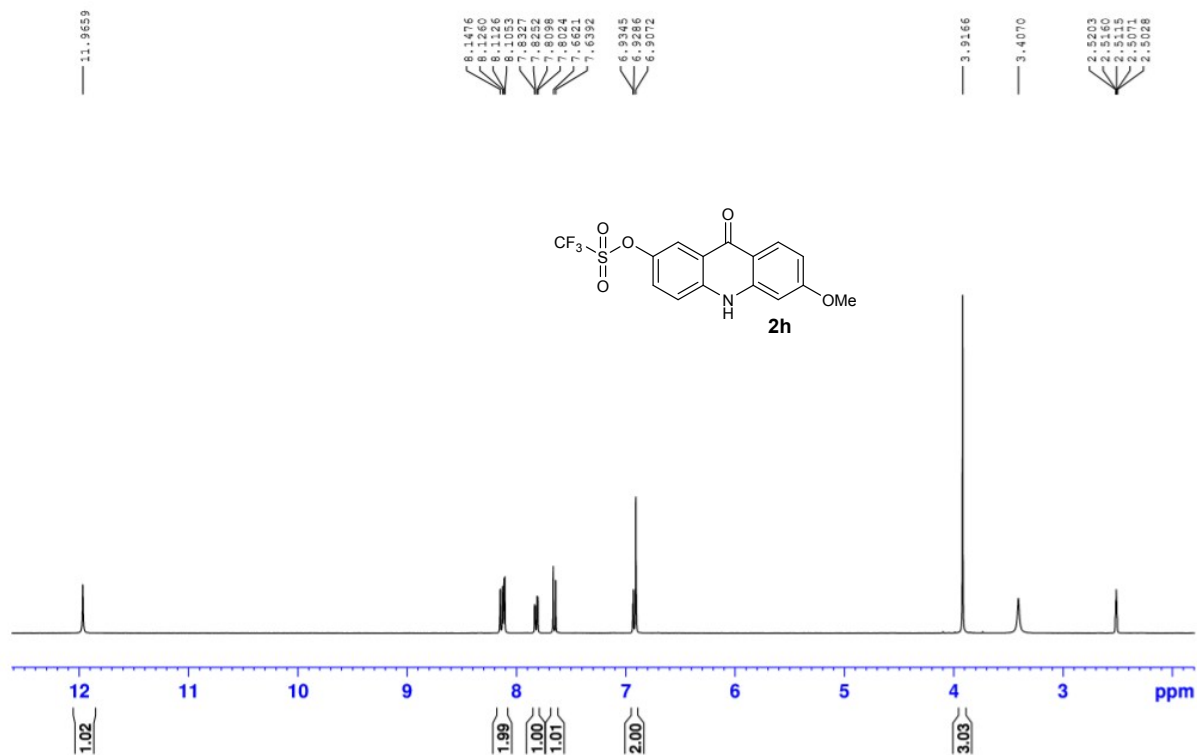



Name KP-160  
 C13CPD DMSO {C:\Bruker\TopSpin3.5p17} Reynold-Papireddy-HYG 24

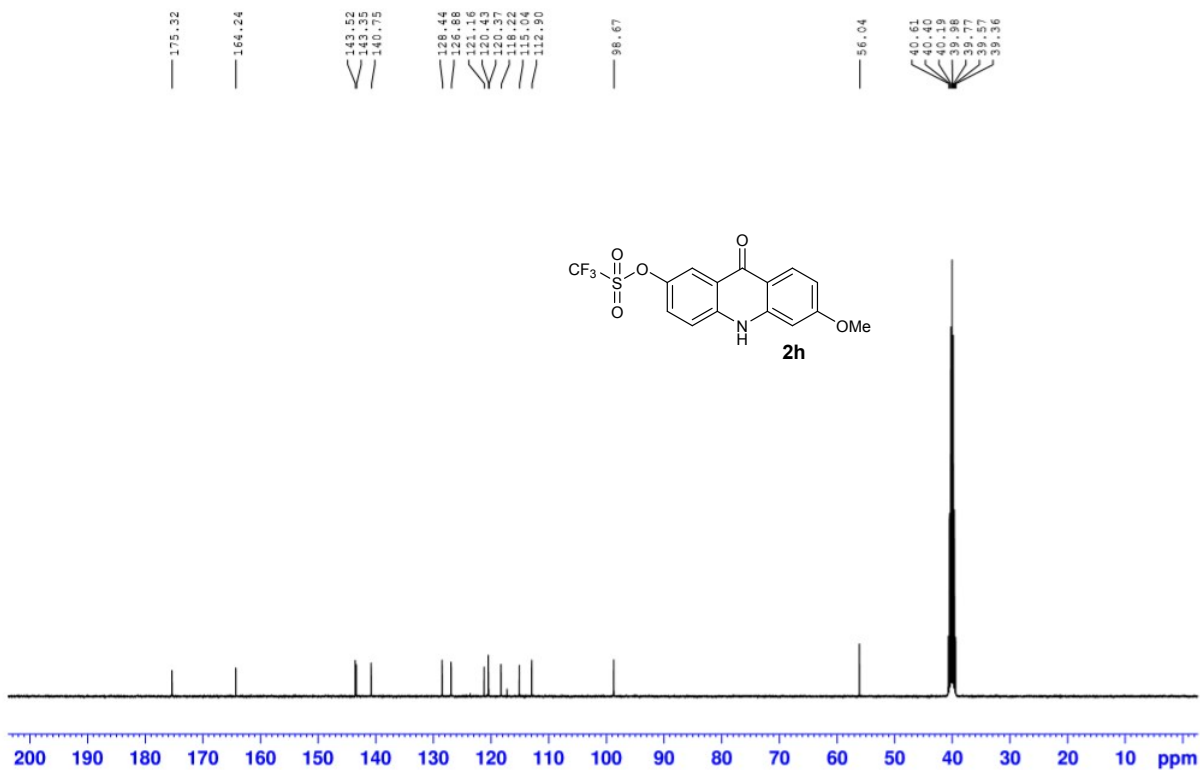

Name KP-140  
 PROTON DMSO {C:\Bruker\TopSpin3.5p17} Reynold-Papireddy-HYG 14

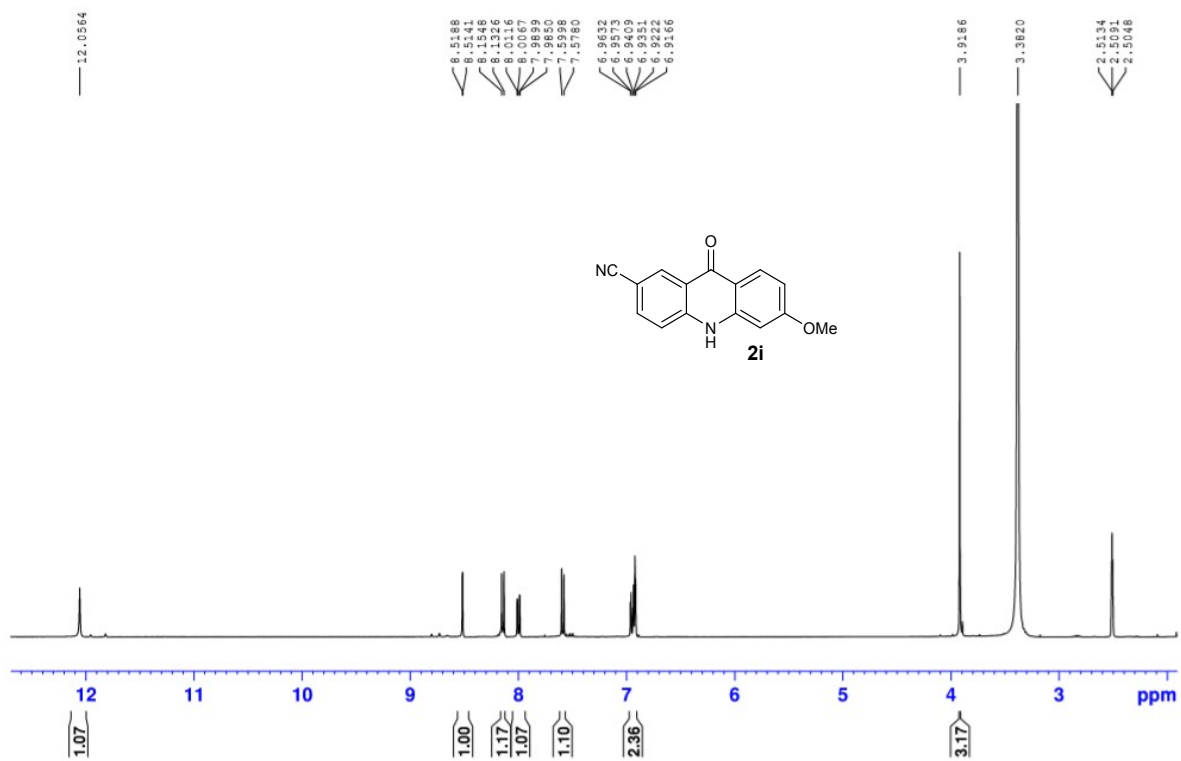

Name KP-140  
 C13CPD DMSO {C:\Bruker\TopSpin3.5p17} Reynold-Papireddy-HYG 9

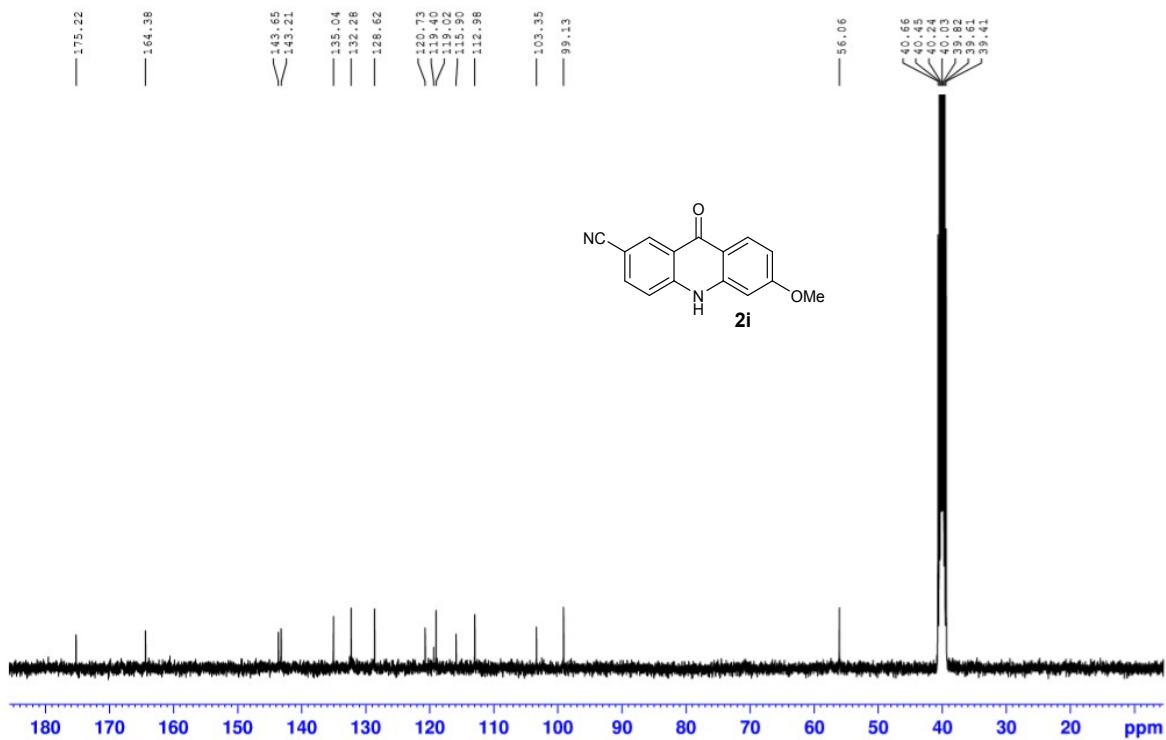

Name KP-132.2  
 PROTON DMSO {C:\Bruker\TopSpin3.5p17} Reynold-Papireddy-HYG 5

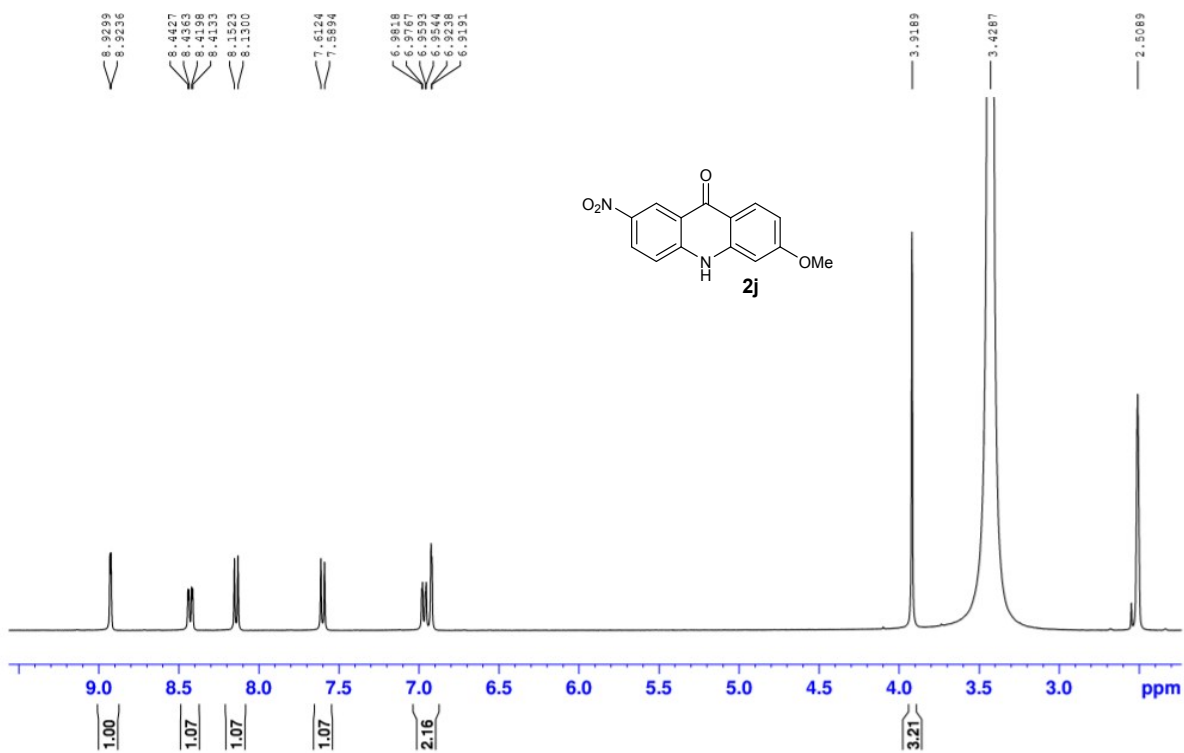

Name KP-132  
C13CPD DMSO {C:\Bruker\TopSpin3.5p17} Reynold-Papireddy-HYG 8

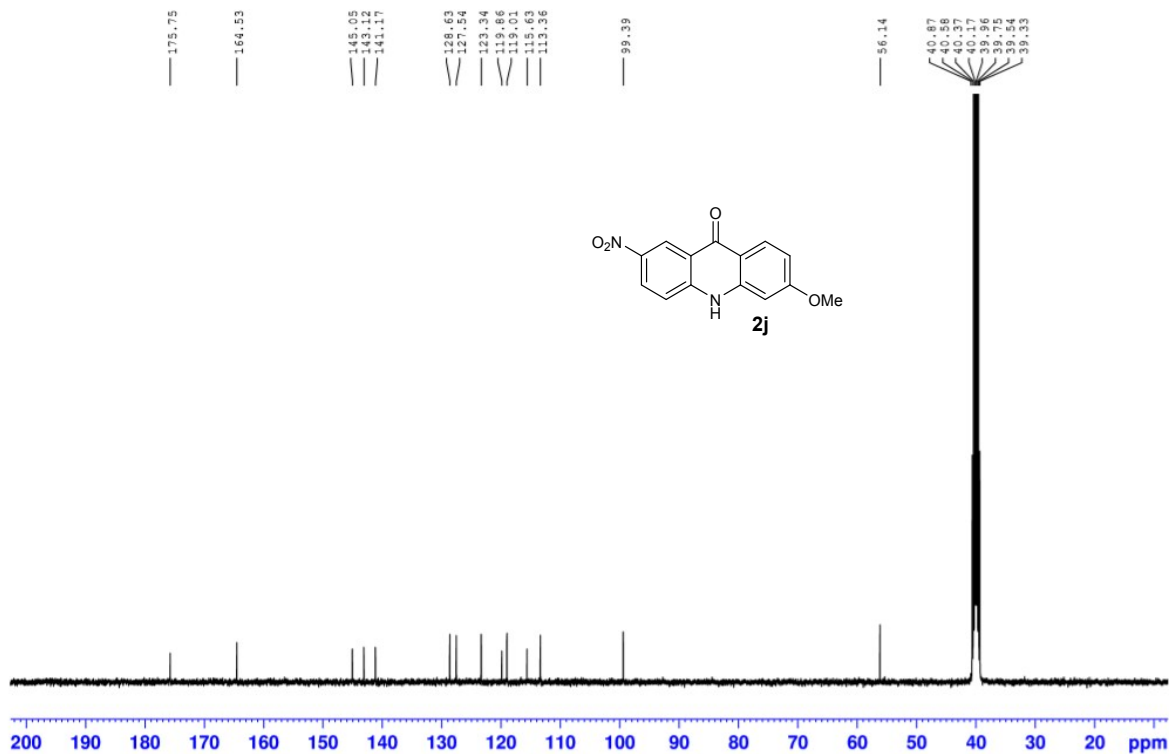

Name KP-150  
PROTON DMSO {C:\Bruker\TopSpin3.5p17} Reynold-Papireddy-HYG 15

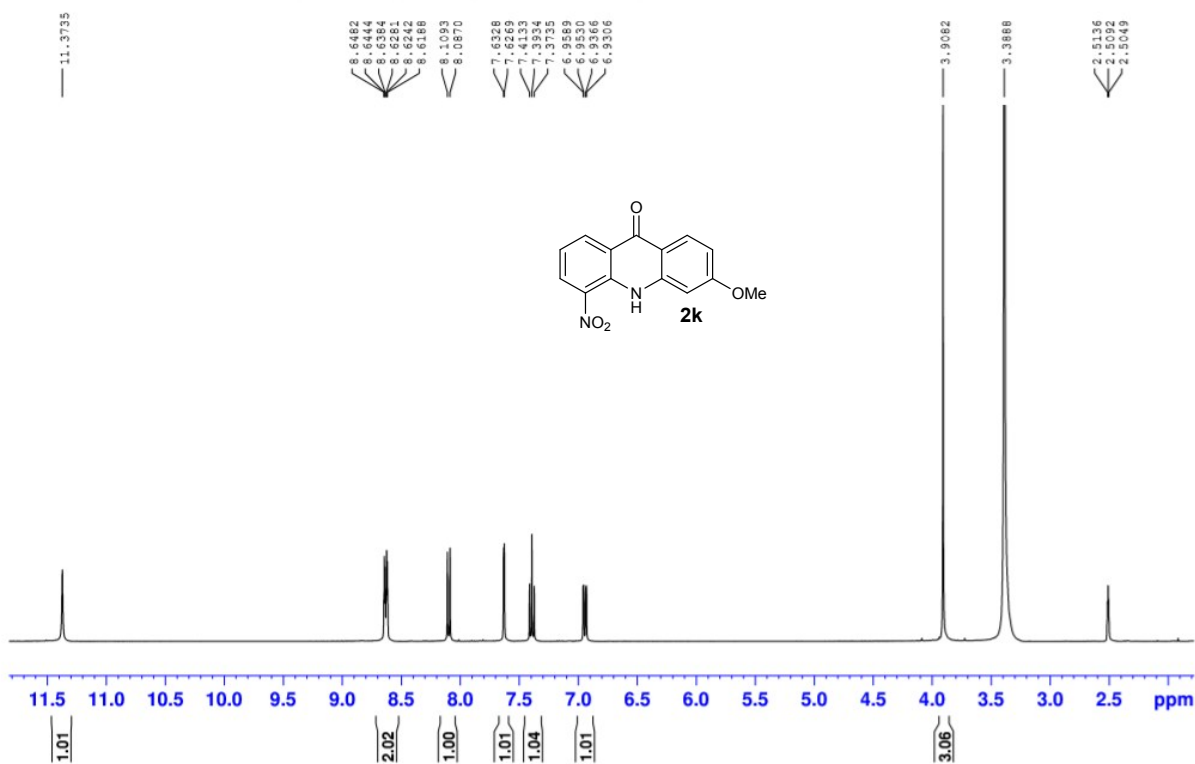

Name KP-150  
 C13CPD DMSO {C:\Bruker\TopSpin3.5p17} Reynold-Papireddy-HYG 21

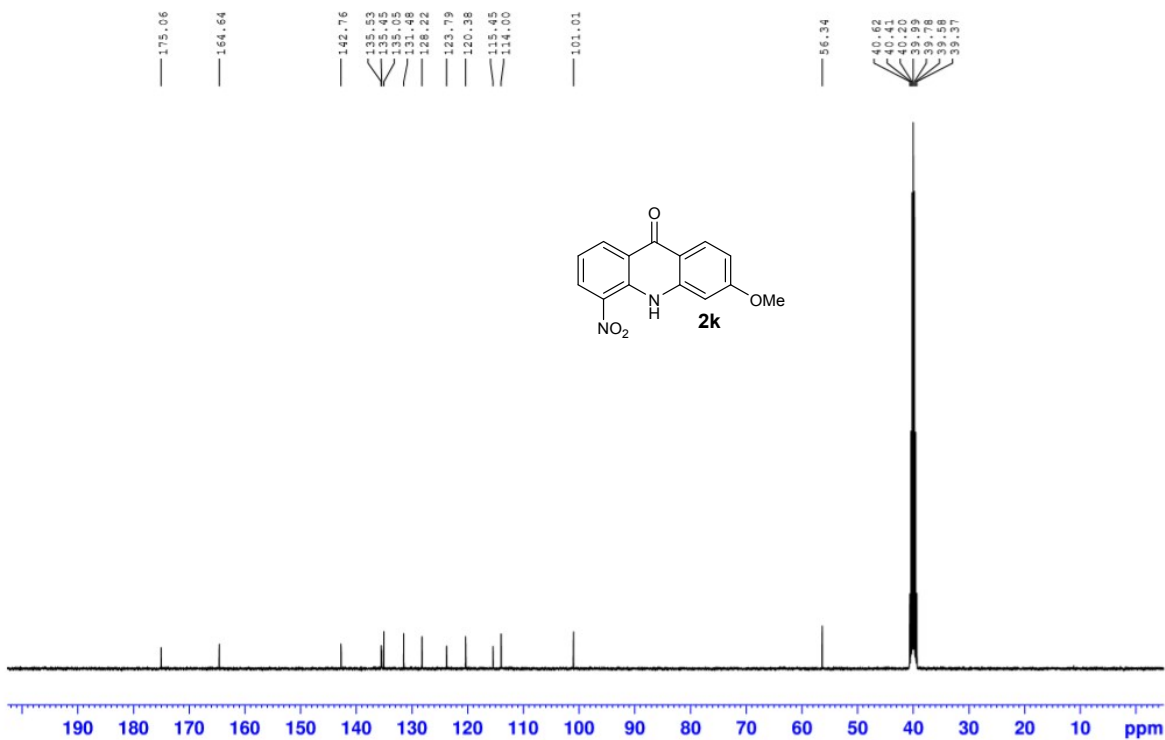

Name KP-182  
 PROTON CDC13 {C:\Bruker\TopSpin3.5p17} Reynold-Papireddy-HYG 15

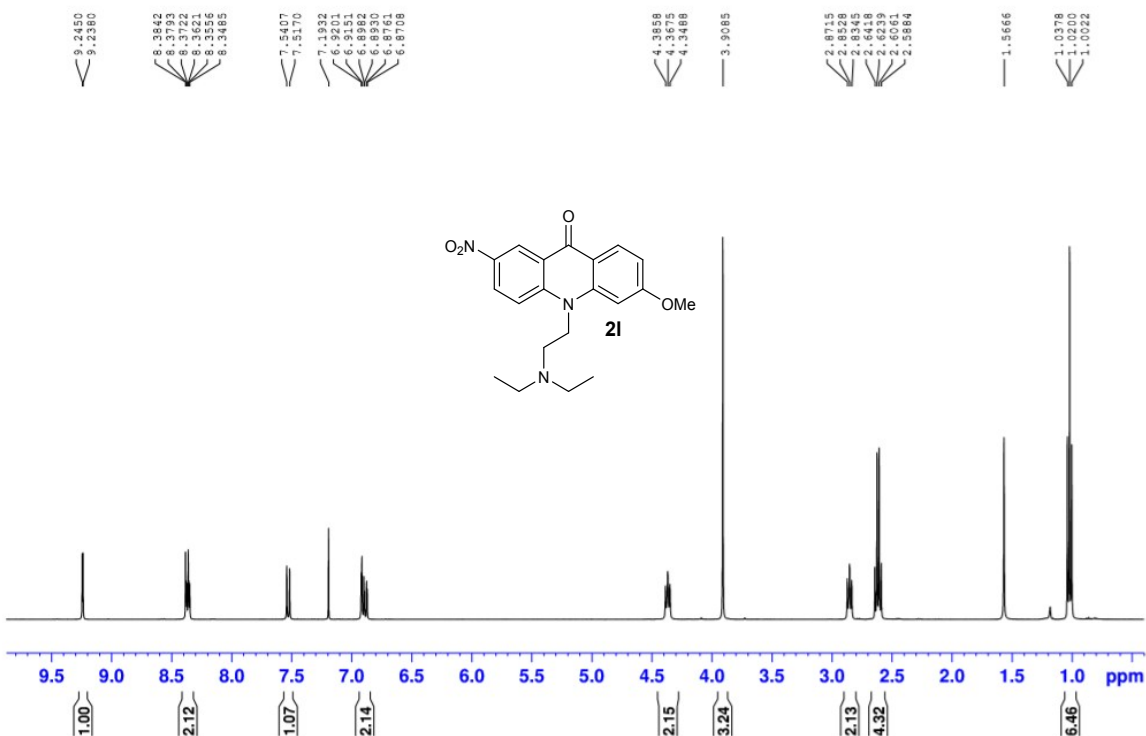

Name **KP-182**  
 C13CPD CDC13 {C:\Bruker\TopSpin3.5p17} Reynold-Papireddy-HYG 3

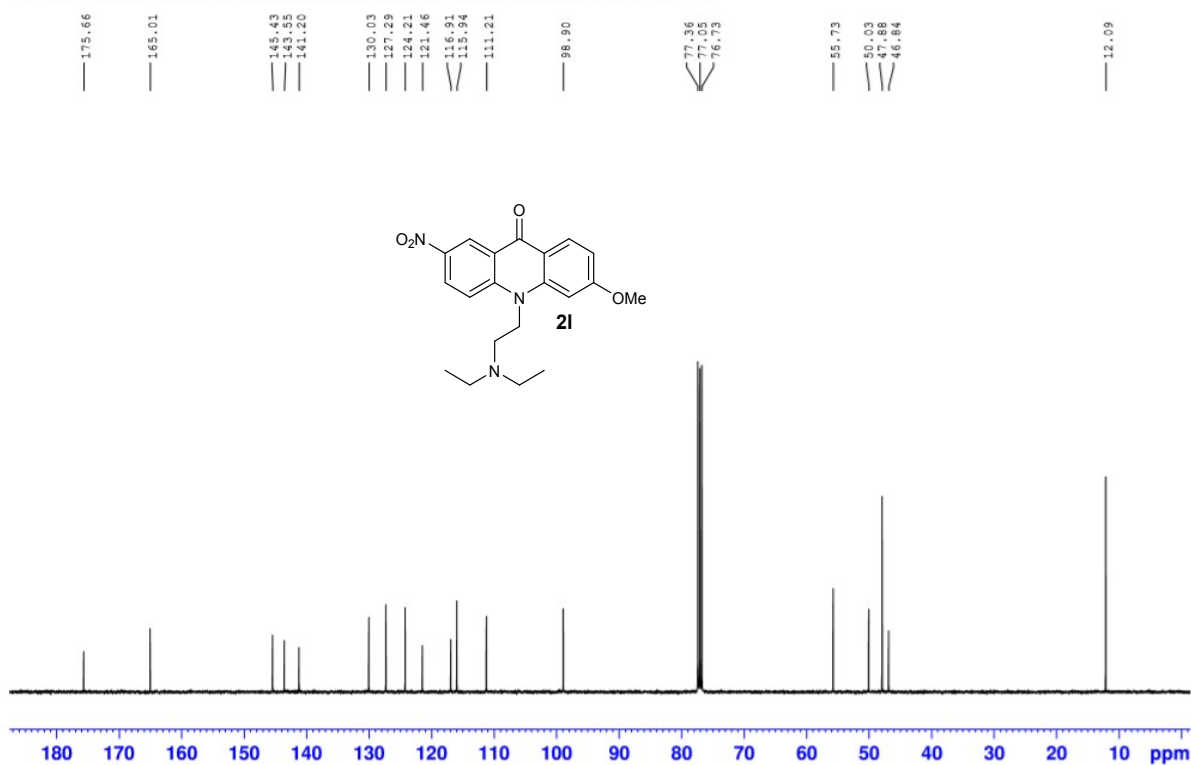

Name **FR1\_s**  
 PROTON DMSO {C:\Bruker\TopSpin3.5p17} Kelly-Rosie 13

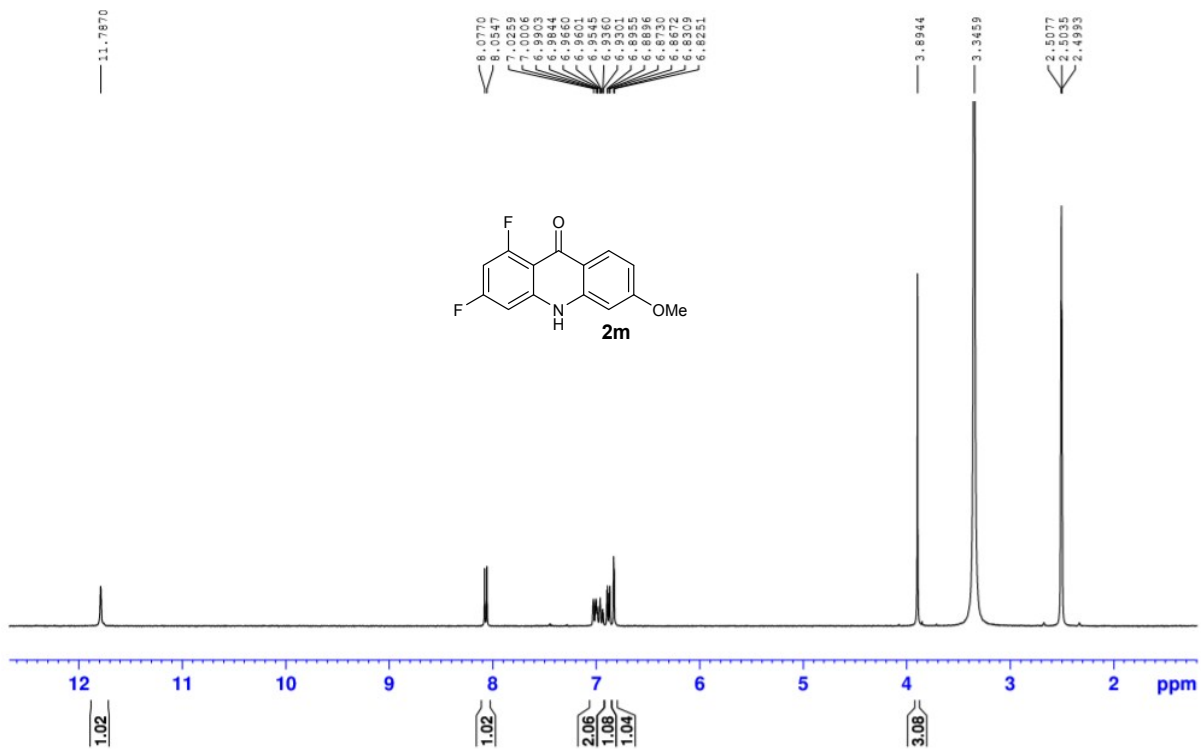

Name TFR2  
 PROTON DMSO {C:\Bruker\TopSpin3.5p17} Kelly-Rosie 14

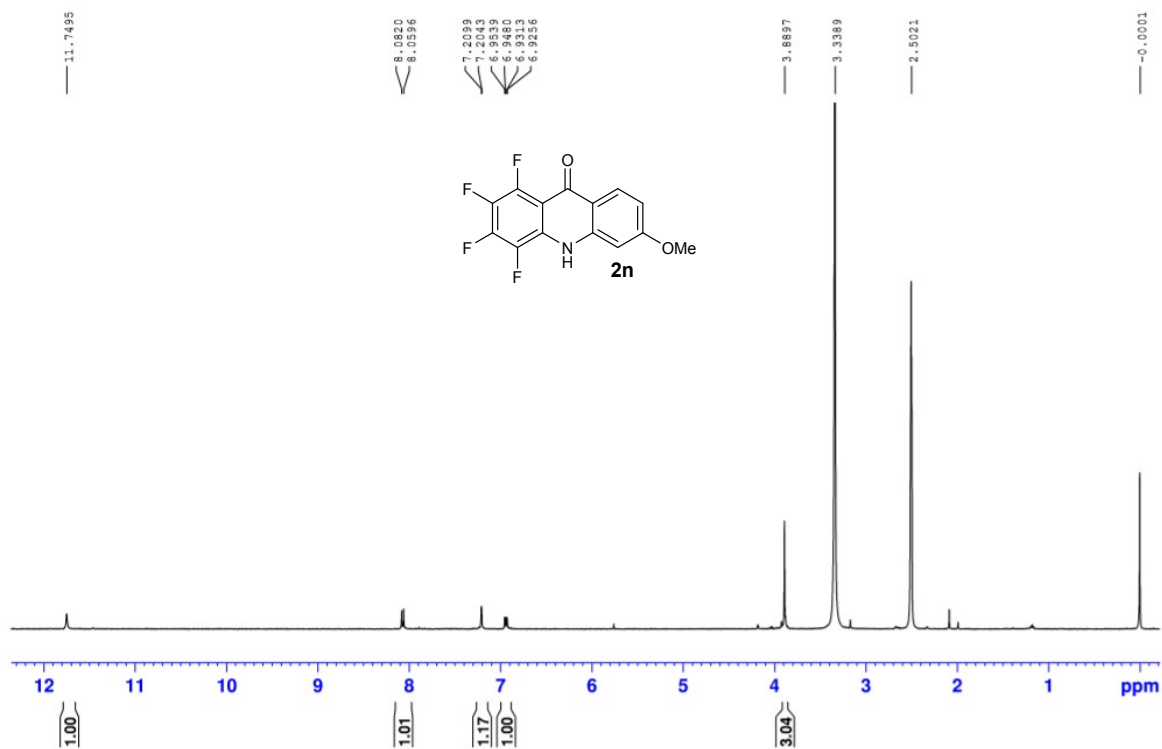

Name KP-156  
 PROTON DMSO {C:\Bruker\TopSpin3.5p17} Reynold-Papireddy-HYG 6

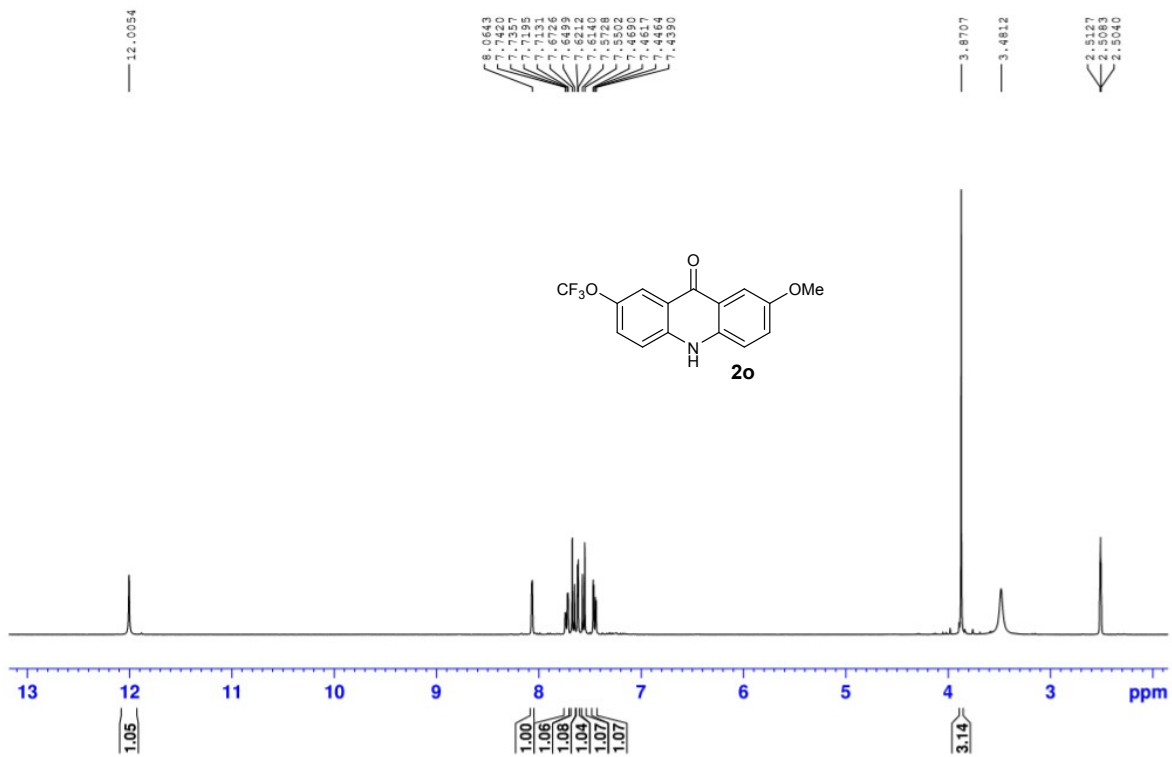

Name KP-156  
 C13CPD DMSO {C:\Bruker\TopSpin3.5p17} Reynold-Papireddy-HYG 23

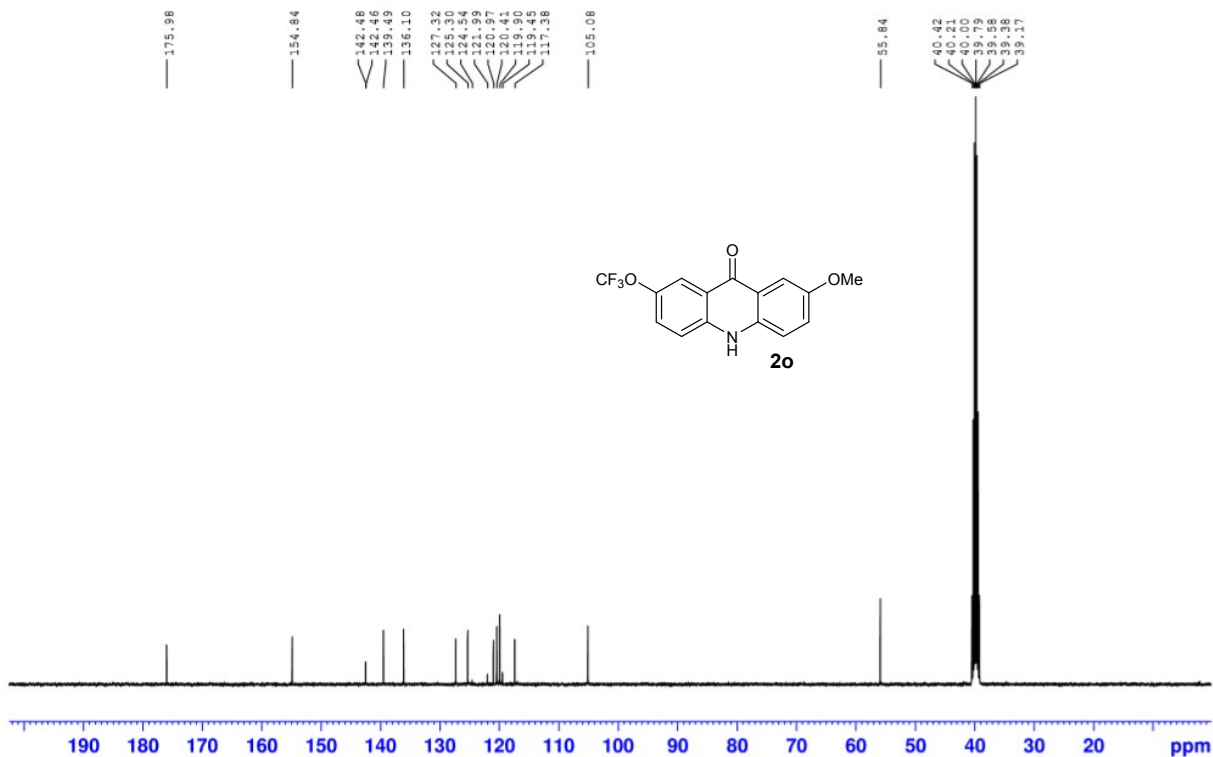

Name KP-154  
 PROTON DMSO {C:\Bruker\TopSpin3.5p17} Reynold-Papireddy-HYG 4

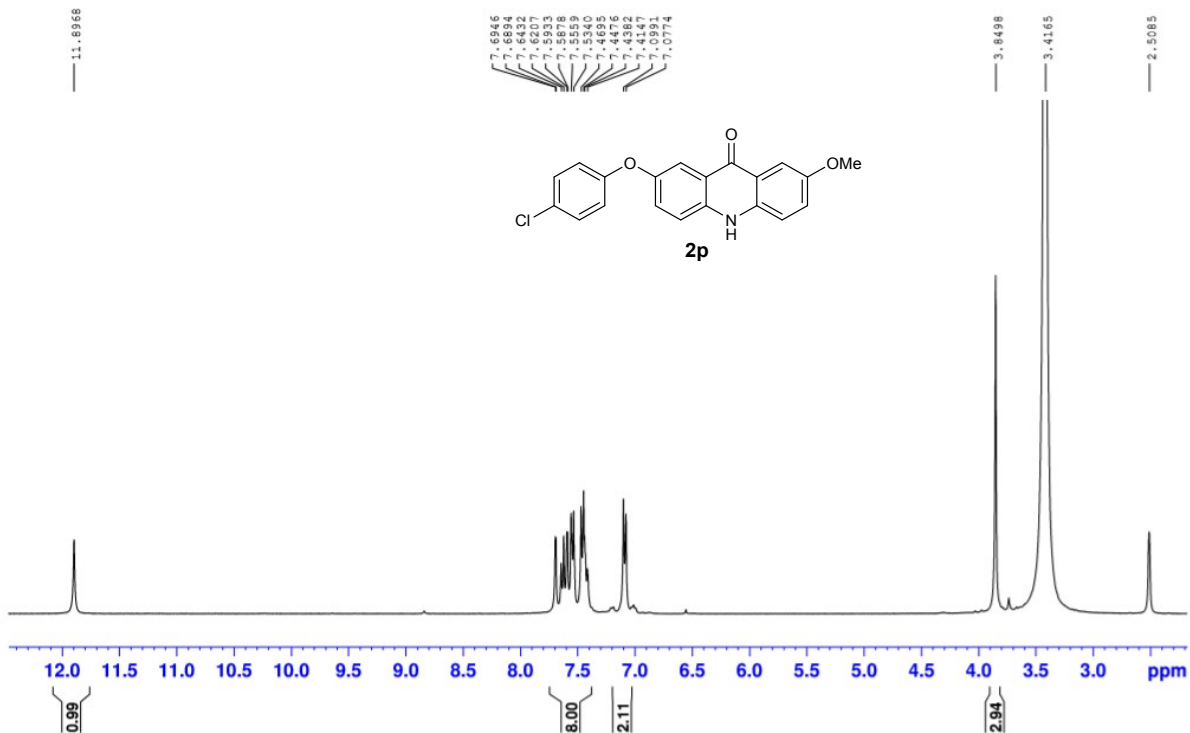

Name KP-154  
 C13CPD DMSO {C:\Bruker\TopSpin3.5pl7} Reynold-Papireddy-HYG 3

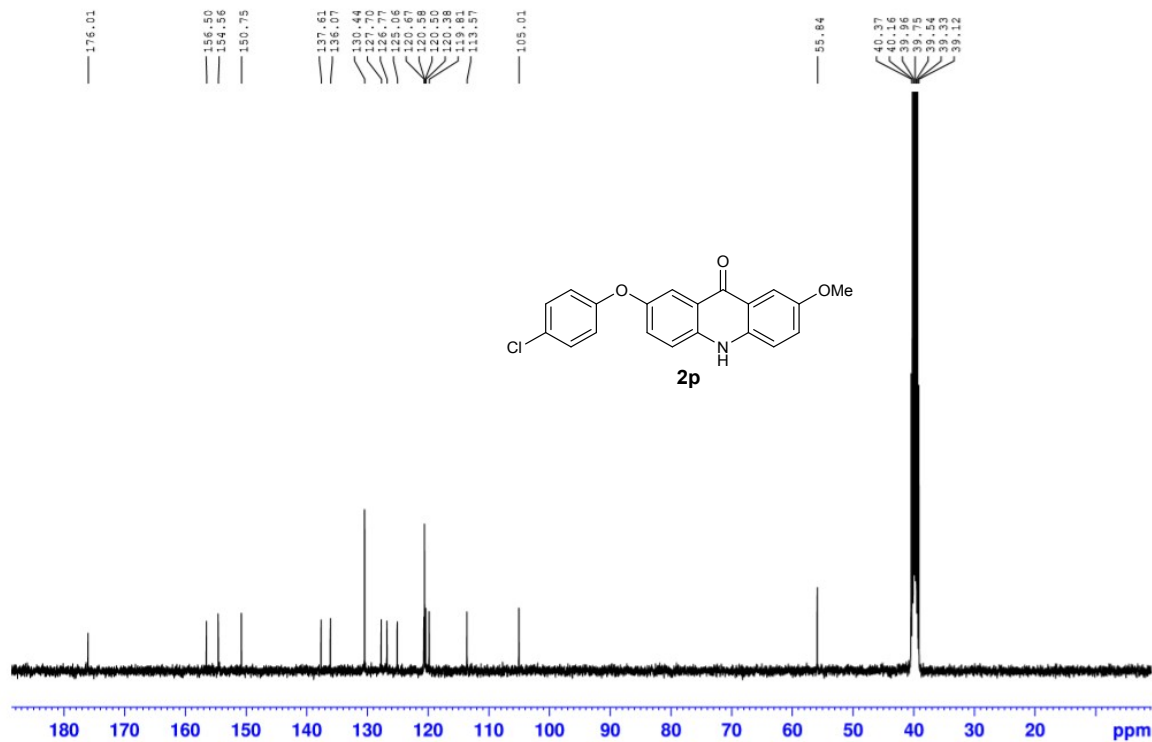

Name KP-155  
 PROTON DMSO {C:\Bruker\TopSpin3.5pl7} Reynold-Papireddy-HYG 5

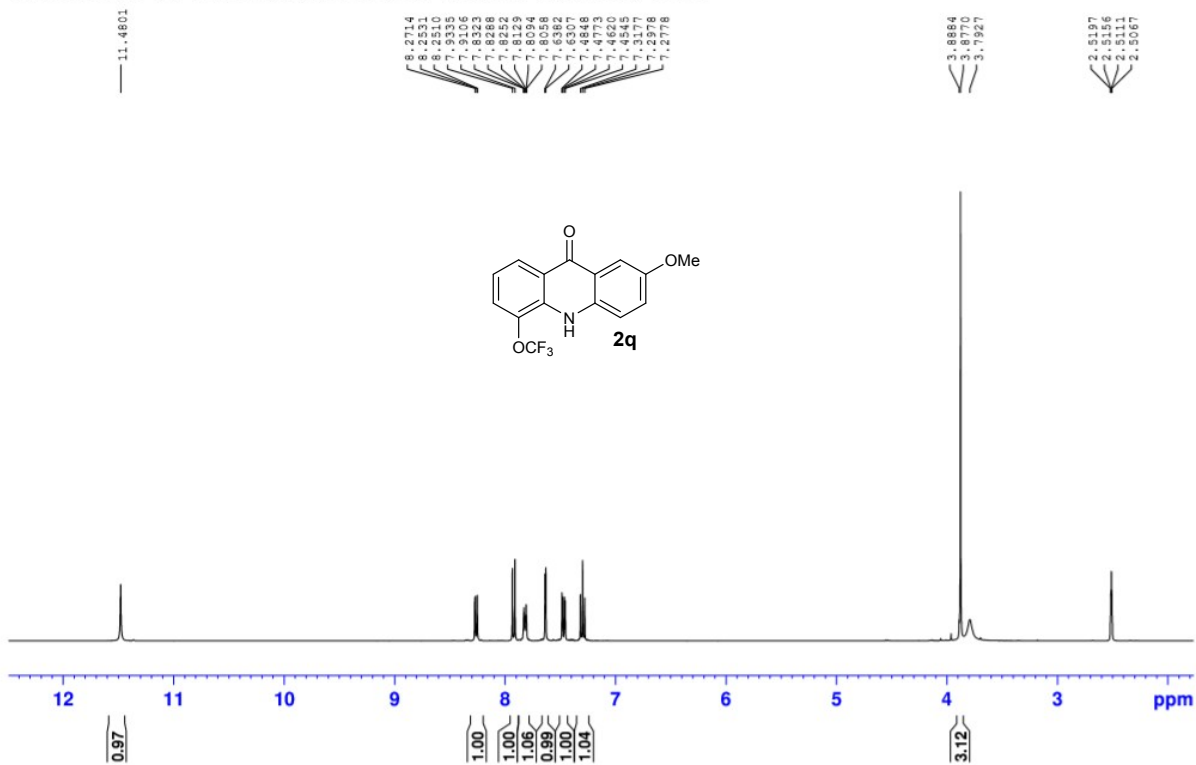



Name KP-155  
 C13CPD DMSO {C:\Bruker\TopSpin3.5pl7} Reynold-Papireddy-HYG 4

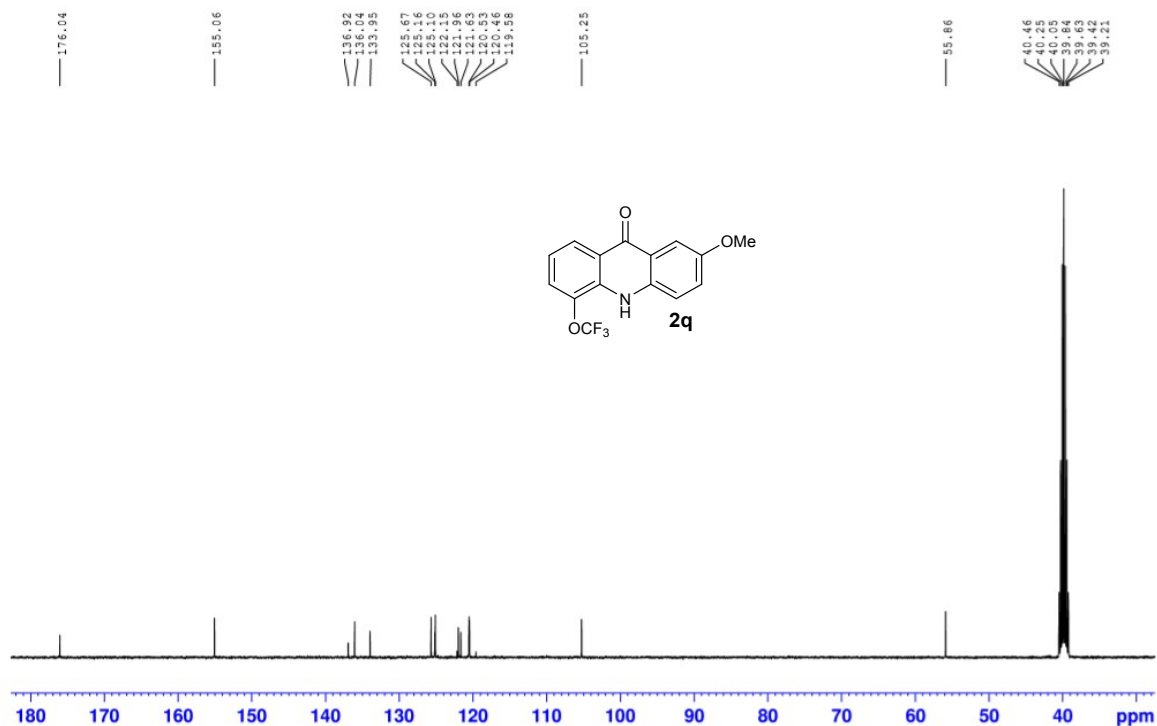

Name KP-151  
 PROTON DMSO {C:\Bruker\TopSpin3.5pl7} Reynold-Papireddy-HYG 16

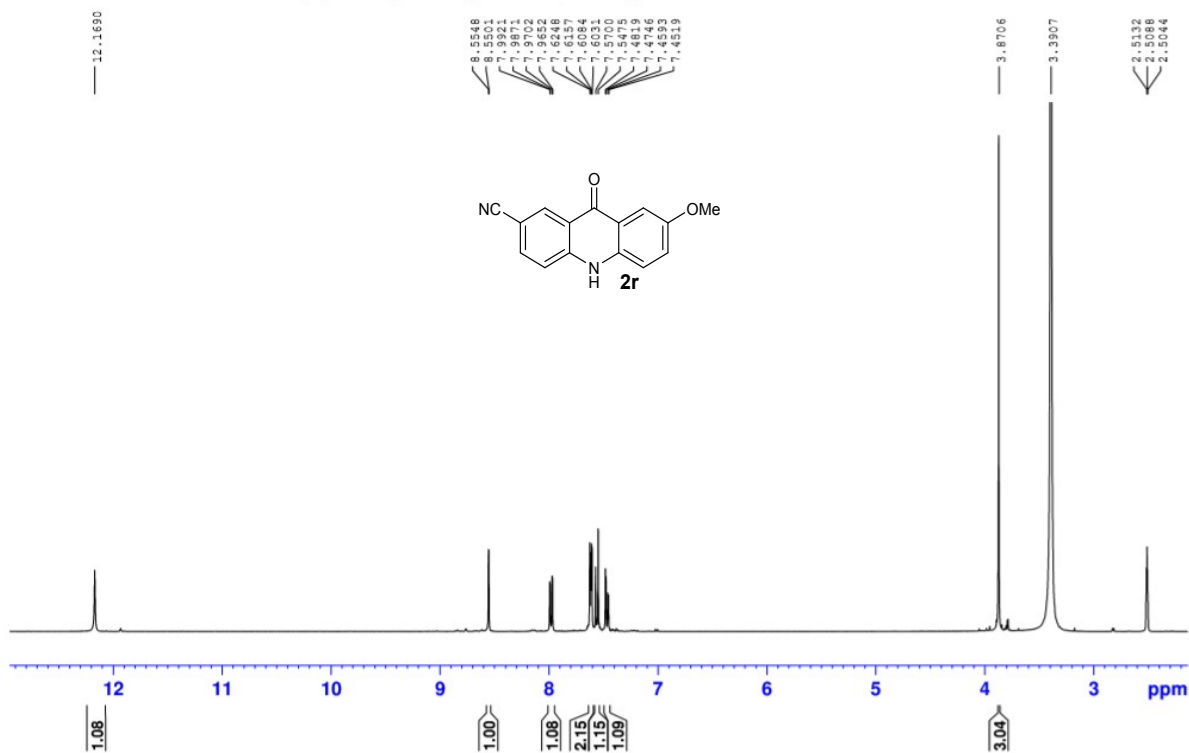

Name KP-151  
C13CPD DMSO {C:\Bruker\TopSpin3.5pl7} Reynold-Papireddy-HYG 22

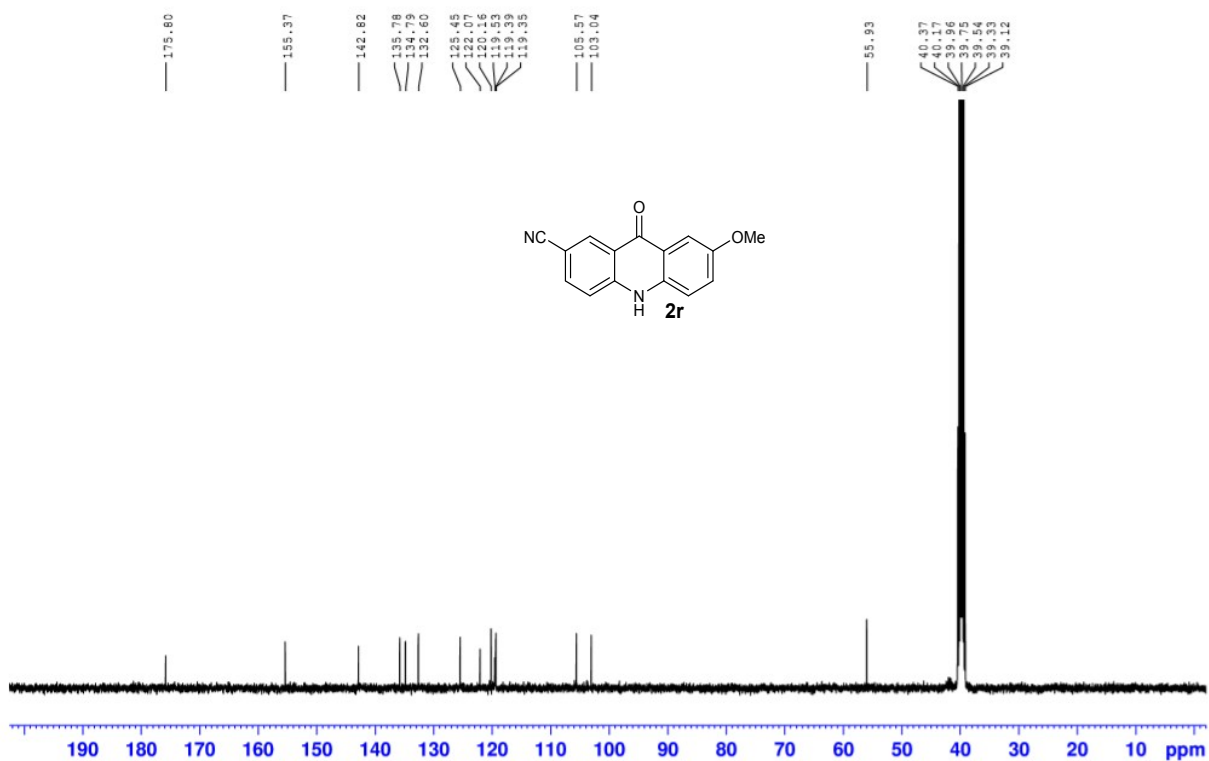

Name KP-116  
PROTON DMSO {C:\Bruker\TopSpin3.5pl7} Reynold-Papireddy-HYG 18

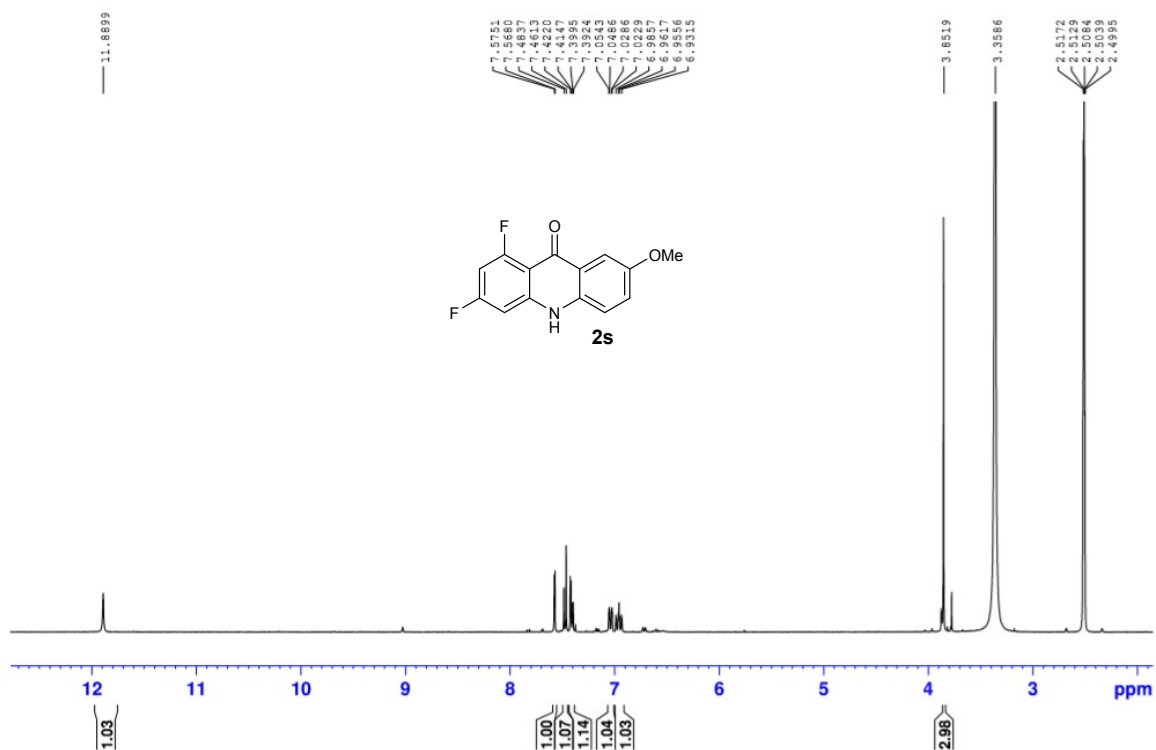

Name KP-116  
 C13CPD DMSO {C:\Bruker\TopSpin3.5p17} Reynold-Papireddy-HYG 15

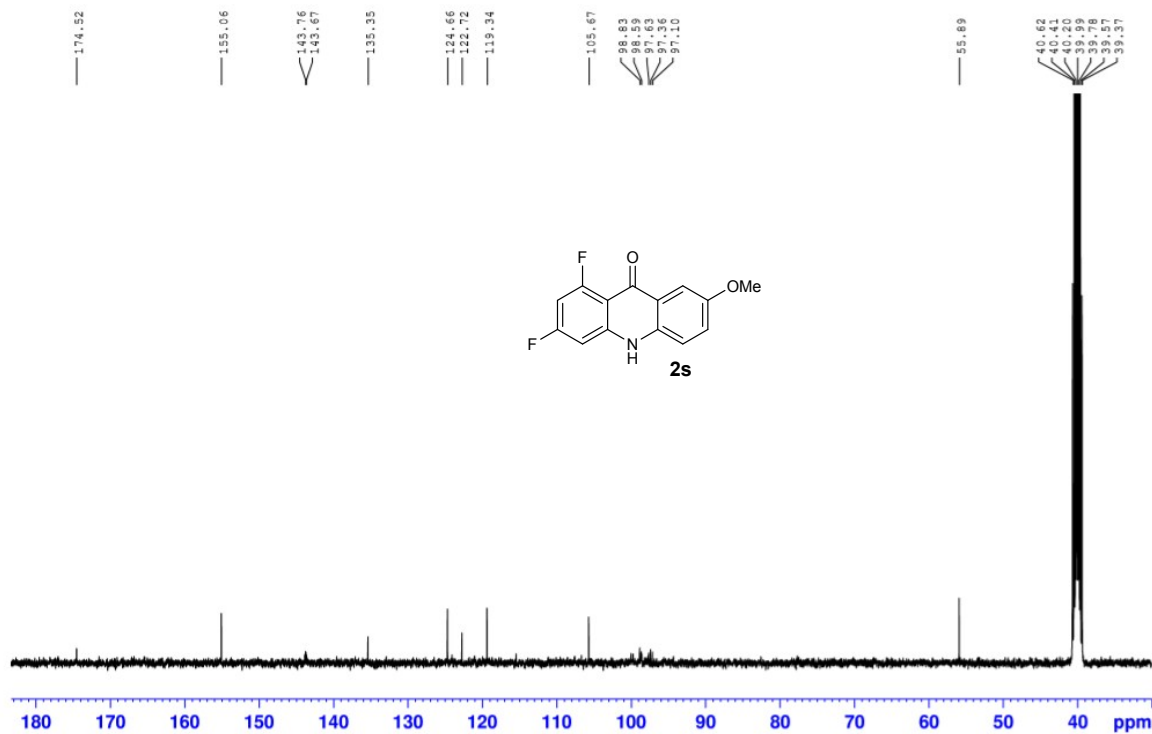

Name TFR1  
 PROTON DMSO {C:\Bruker\TopSpin3.5p17} Kelly-Rosie 10

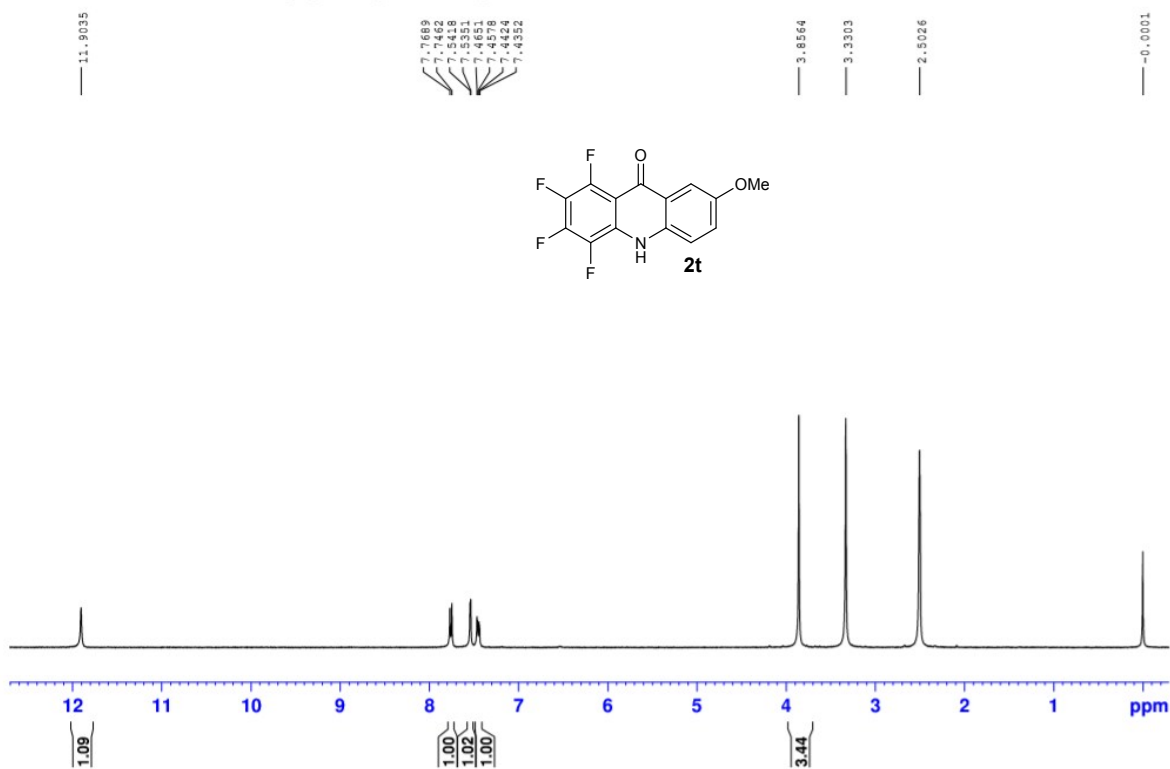

Name KP-120  
PROTON DMSO {C:\Bruker\TopSpin3.5pl7} Reynold-Papireddy-HYG 21

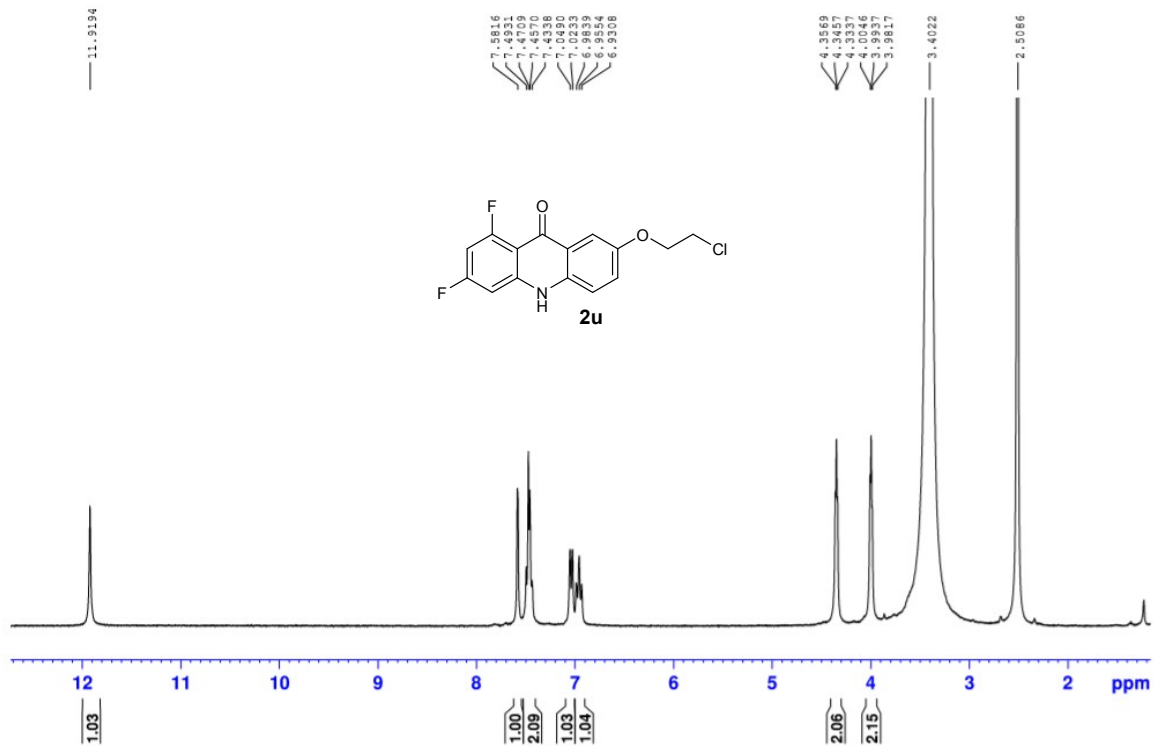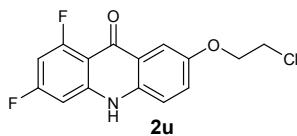

Name KP-120  
C13CPD DMSO {C:\Bruker\TopSpin3.5pl7} Reynold-Papireddy-HYG 13

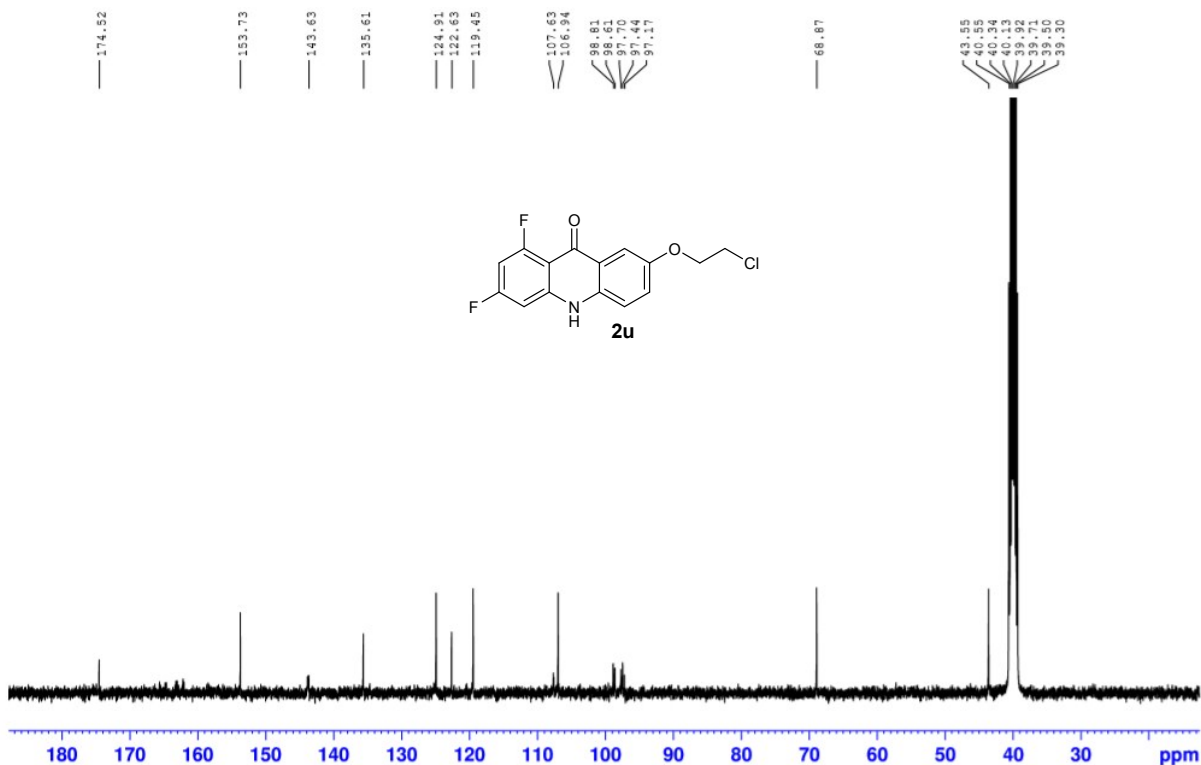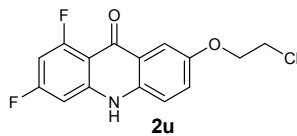

Name KP-167  
 PROTON DMSO {C:\Bruker\TopSpin3.5p17} Reynold-Papireddy-HYG 3

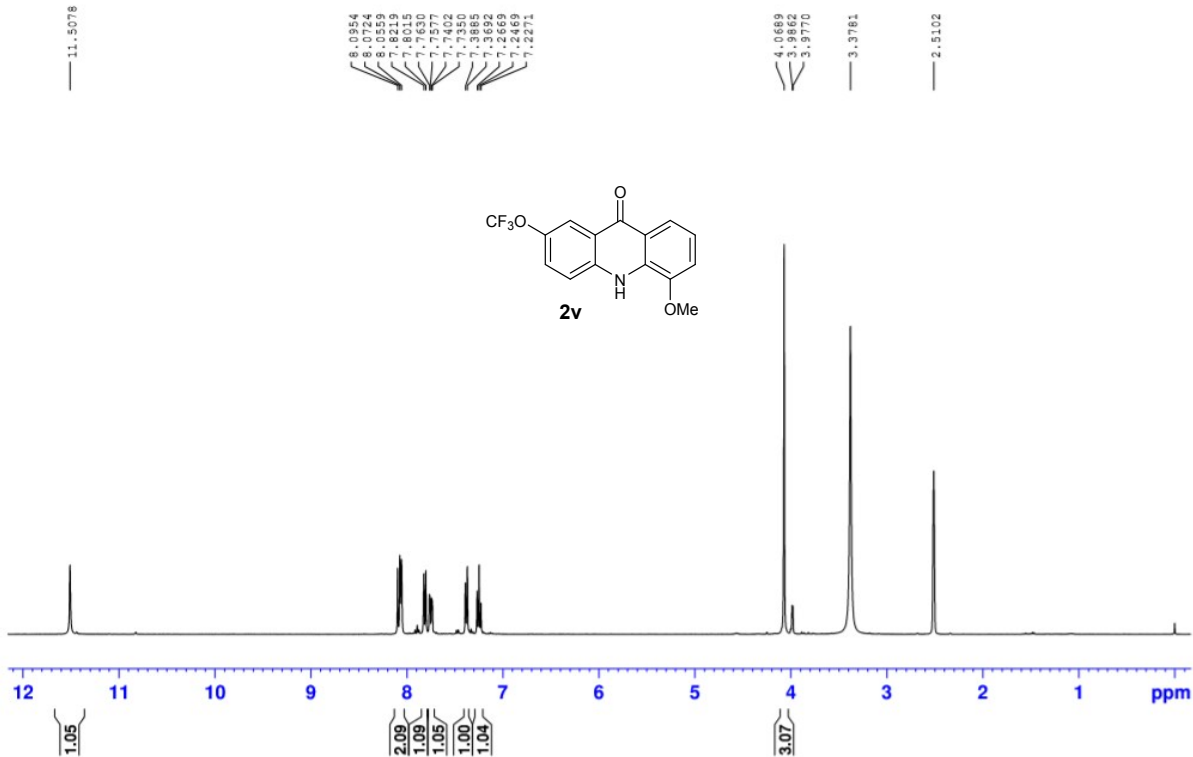

Name KP-167  
 C13CPD DMSO {C:\Bruker\TopSpin3.5p17} Reynold-Papireddy-HYG 5

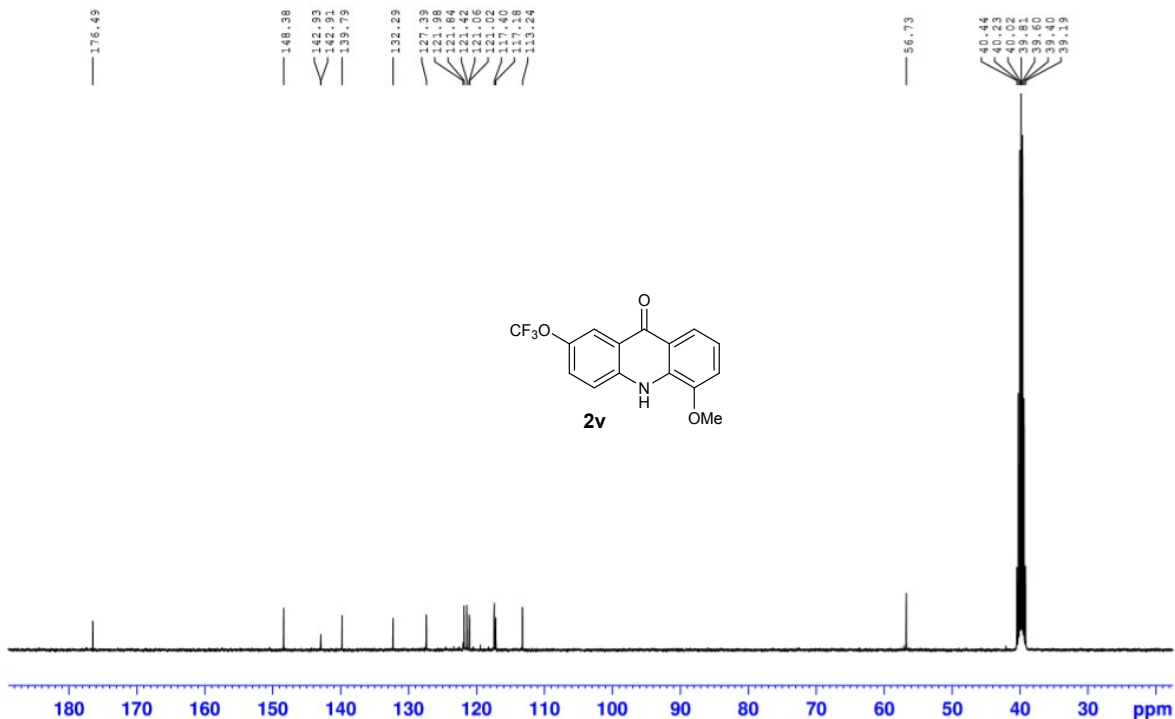

Name KP-173  
 PROTON DMSO {C:\Bruker\TopSpin3.5pl7} Reynold-Papireddy-HYG 18

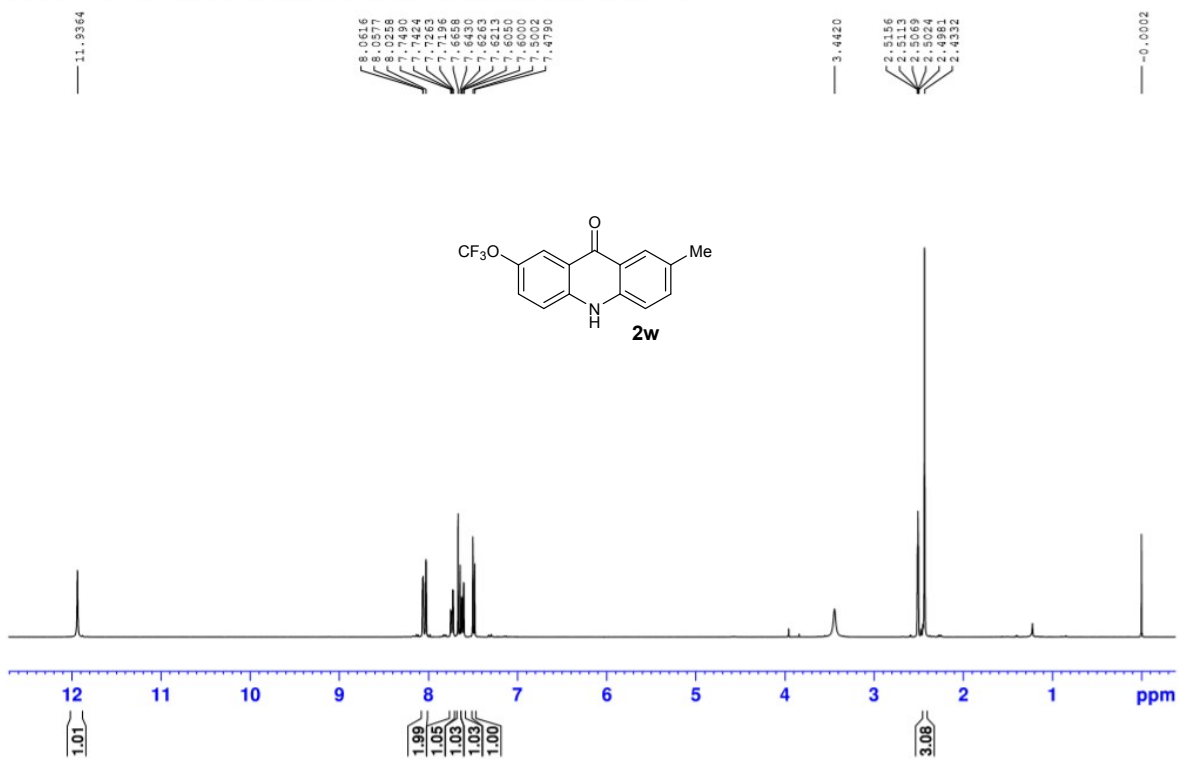

Name KP-173  
 C13CPD DMSO {C:\Bruker\TopSpin3.5pl7} Reynold-Papireddy-HYG 17

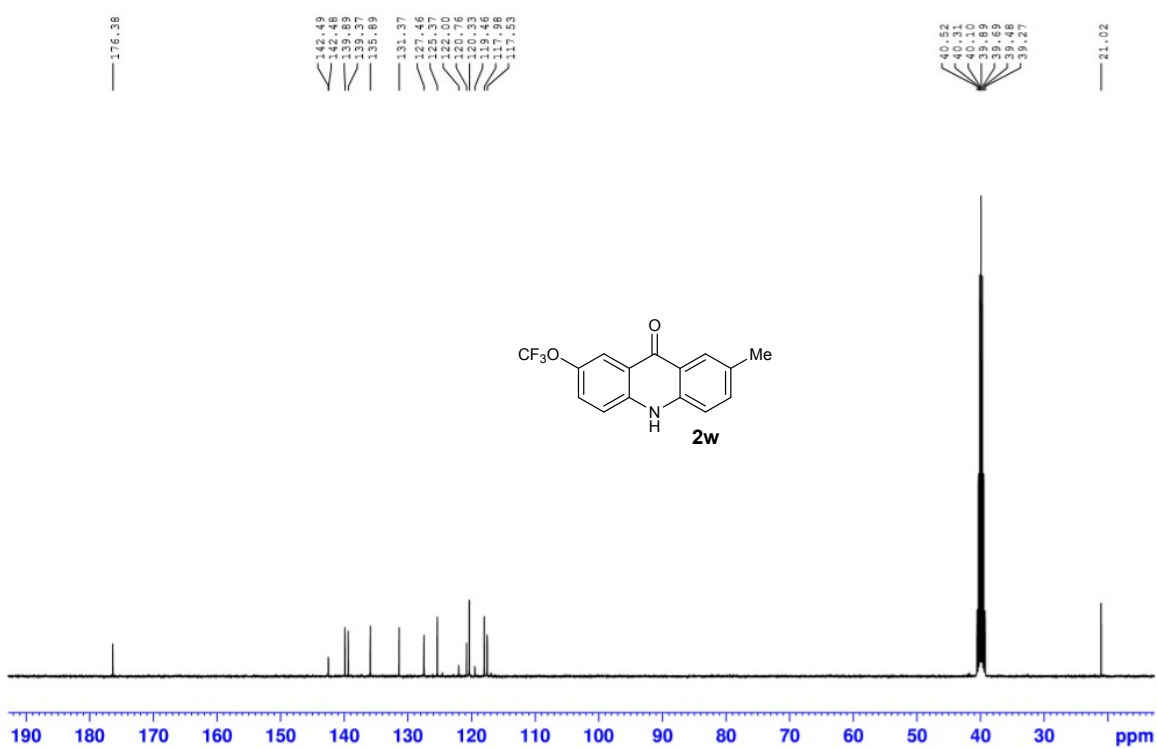

Name KP-177,2  
PROTON DMSO {C:\Bruker\TopSpin3.5p17} Reynold-Papireddy-HYG 17

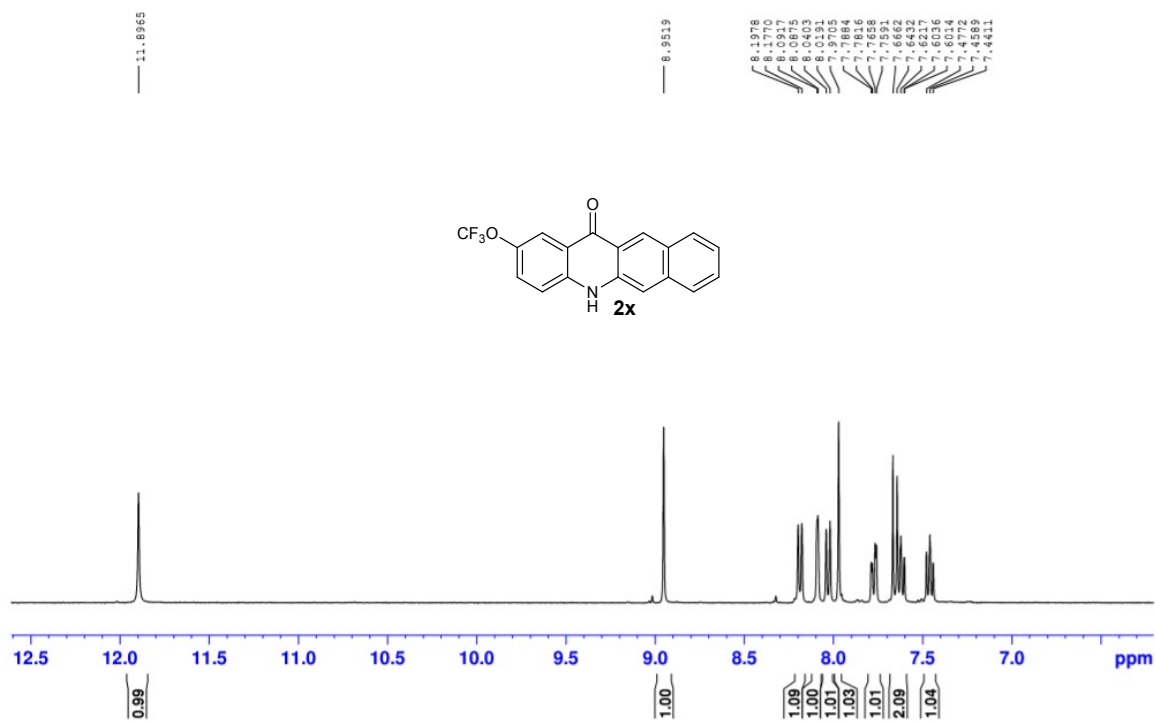

Name KP-177  
C13CPD DMSO {C:\Bruker\TopSpin3.5p17} Reynold-Papireddy-HYG 6

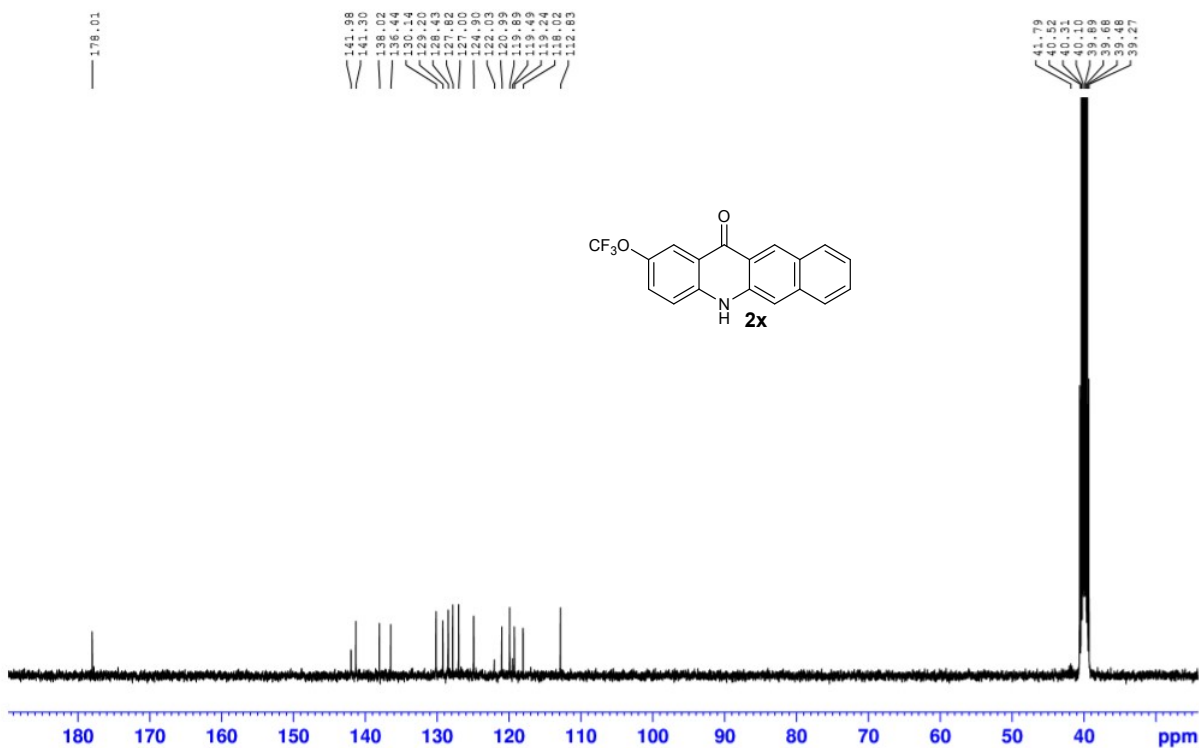

Supplement: c9ra09478d1.pdf [file c9ra09478d1.pdf]
